# Supplementary material for: The genomic landscape of intrinsic and acquired resistance to cyclin-dependent kinase 4/6 inhibitors in patients with hormone receptor positive metastatic breast cancer
Source: bioRxiv preprint, doi:10.1101/857839, version 1 (2019-11-28)
Supplement: Supplemental Table 4 [file 857839_file17.xlsx]

## Sheet: Enrichment.Mutations.table.inc.
Supplemental Table 4. Enrichment analysis of mutation in resistant vs. sensitive tumors
Gene	Mut.Type	odds.ratio	p.value	Percent.Pts.test.hit	Percent.Pts.ctrl.hit	N.samples.test.hit	N.samples.ctrl.hit	N.Pts.test.hit	N.Pts.ctrl.hit	samples.test.hit	samples.ctrl.hit
TP53	HOMDEL	Inf	3.9275e-05	0.525	0	22	0	21	0	299_T1, 401_T1, 303_T1, 394_T2, 385_T1, 338_T1, 383_T1, 391_T1, 331_T1, 185_T1, 307_T1, 294_T2, 408_T1A, 195_T1, 408_T1B, 346_T1, 386_T1, 606_T1, 568_T1, 538_T1, 535_T1, 496_T1
NCOA3	GAIN.up	Inf	0.00626473	0.3	0	12	0	12	0	366_T2, 473_T1, 394_T2, 195_T1, 338_T1, 333_T1, 397_T1, 307_T1, 349_T1, 383_T1, 295_T1, 538_T1
AURKA	GAIN.up	Inf	0.0101532	0.275	0	11	0	11	0	195_T1, 366_T2, 303_T1, 292_T1, 333_T1, 473_T1, 397_T1, 191_T1, 349_T1, 538_T1, 295_T1
NFATC2	GAIN.up	Inf	0.0101532	0.275	0	11	0	11	0	473_T1, 195_T1, 338_T1, 333_T1, 292_T1, 397_T1, 191_T1, 349_T1, 366_T2, 538_T1, 295_T1
PTPN1	GAIN.up	Inf	0.0162451	0.25	0	10	0	10	0	394_T2, 366_T2, 195_T1, 338_T1, 295_T1, 333_T1, 292_T1, 397_T1, 538_T1, 349_T1
SALL4	GAIN.up	Inf	0.0162451	0.25	0	10	0	10	0	366_T2, 195_T1, 338_T1, 333_T1, 292_T1, 397_T1, 191_T1, 349_T1, 295_T1, 538_T1
PAK1	ACT.inc	Inf	0.0401214	0.2	0	9	0	8	0	366_T2, 290_T2, 307_T1, 315_T1, 408_T1B, 338_T1, 408_T1A, 496_T1, 568_T1
PREX2	ACT.inc	Inf	0.0401214	0.2	0	8	0	8	0	195_T1, 366_T2, 473_T1, 307_T1, 346_T1, 333_T1, 386_T1, 385_T1
PAK1	GAIN.up	Inf	0.0401214	0.2	0	9	0	8	0	290_T2, 307_T1, 315_T1, 408_T1B, 338_T1, 408_T1A, 496_T1, 568_T1, 606_T1
SRC	GAIN.up	Inf	0.0401214	0.2	0	8	0	8	0	394_T2, 195_T1, 333_T1, 397_T1, 307_T1, 538_T1, 366_T2, 568_T1
IKBKB	GAIN.up	Inf	0.0401214	0.2	0	8	0	8	0	195_T1, 333_T1, 307_T1, 386_T1, 329_T1, 381_T1, 294_T2, 535_T1
PAK1	ACT	Inf	0.0620059	0.175	0	8	0	7	0	290_T2, 307_T1, 315_T1, 408_T1B, 338_T1, 408_T1A, 496_T1, 568_T1
NCOA2	ACT	Inf	0.0620059	0.175	0	7	0	7	0	307_T1, 346_T1, 195_T1, 386_T1, 333_T1, 473_T1, 385_T1
PREX2	ACT	Inf	0.0620059	0.175	0	7	0	7	0	195_T1, 473_T1, 307_T1, 346_T1, 333_T1, 386_T1, 385_T1
RECQL4	ACT	Inf	0.0620059	0.175	0	7	0	7	0	307_T1, 195_T1, 346_T1, 386_T1, 473_T1, 329_T1, 385_T1
WNT11	ACT	Inf	0.0620059	0.175	0	8	0	7	0	307_T1, 408_T1B, 408_T1A, 290_T2, 338_T1, 315_T1, 568_T1, 496_T1
WNT11	ACT.inc	Inf	0.0620059	0.175	0	8	0	7	0	307_T1, 408_T1B, 408_T1A, 290_T2, 338_T1, 315_T1, 568_T1, 496_T1
PLCG1	GAIN.up	Inf	0.0620059	0.175	0	7	0	7	0	307_T1, 338_T1, 195_T1, 397_T1, 366_T2, 538_T1, 295_T1
RPTOR	GAIN.up	Inf	0.0620059	0.175	0	7	0	7	0	294_T2, 307_T1, 398_T1, 195_T1, 191_T1, 177_Prospective1, 496_T1
MAFB	GAIN.up	Inf	0.0620059	0.175	0	7	0	7	0	338_T1, 195_T1, 397_T1, 307_T1, 366_T2, 538_T1, 295_T1
WNT11	GAIN.up	Inf	0.0620059	0.175	0	8	0	7	0	307_T1, 408_T1B, 408_T1A, 290_T2, 338_T1, 315_T1, 568_T1, 496_T1
PAK1	AMP.up	Inf	0.0620059	0.175	0	8	0	7	0	290_T2, 307_T1, 315_T1, 408_T1B, 338_T1, 408_T1A, 496_T1, 568_T1
NCOA2	AMP.up	Inf	0.0620059	0.175	0	7	0	7	0	307_T1, 346_T1, 195_T1, 386_T1, 333_T1, 473_T1, 385_T1
PREX2	AMP.up	Inf	0.0620059	0.175	0	7	0	7	0	195_T1, 473_T1, 307_T1, 346_T1, 333_T1, 386_T1, 385_T1
RECQL4	AMP.up	Inf	0.0620059	0.175	0	7	0	7	0	307_T1, 195_T1, 346_T1, 386_T1, 473_T1, 329_T1, 385_T1
WNT11	AMP.up	Inf	0.0620059	0.175	0	8	0	7	0	307_T1, 408_T1B, 408_T1A, 290_T2, 338_T1, 315_T1, 568_T1, 496_T1
ESR1	ACT	3.26988	0.0707641	0.4	0.166667	16	3	16	3	177_Prospective1, 191_T1, 294_T2, 295_T1, 329_T1, 333_T1, 383_T1, 386_T1, 397_T1, 459_Archival1, 473_T1, 496_T1, 535_T1, 568_T1, 307_T1, 185_T1	260_T1, 515_T1, 516_T1
ESR1	ACT.inc	3.26988	0.0707641	0.4	0.166667	16	3	16	3	177_Prospective1, 191_T1, 294_T2, 295_T1, 329_T1, 333_T1, 383_T1, 386_T1, 397_T1, 459_Archival1, 473_T1, 496_T1, 535_T1, 568_T1, 307_T1, 185_T1	260_T1, 515_T1, 516_T1
PTK6	GAIN.up	5.53858	0.0771642	0.25	0.0555556	10	1	10	1	385_T1, 303_T1, 195_T1, 333_T1, 397_T1, 383_T1, 349_T1, 295_T1, 366_T2, 538_T1	372_T1
FGF4	GAIN.up	3.77532	0.0772716	0.325	0.111111	14	2	13	2	408_T1B, 408_T1A, 290_T2, 191_T1, 307_T1, 349_T1, 338_T1, 430_T1, 538_T1, 568_T1, 177_Prospective1, 496_T1, 299_T1, 459_Archival1	376_T2, 434_T1
RAS		Inf	0.0948325	0.15	0	6	0	6	0	398_T1, 331_T1, 430_T1, 290_T2, 397_T1, 535_T1
FGF3	GAIN.up	3.36546	0.107917	0.3	0.111111	13	2	12	2	408_T1B, 408_T1A, 290_T2, 191_T1, 307_T1, 349_T1, 177_Prospective1, 338_T1, 430_T1, 459_Archival1, 568_T1, 496_T1, 538_T1	376_T2, 434_T1
GNAS	GAIN.up	3.36546	0.107917	0.3	0.111111	12	2	12	2	349_T1, 473_T1, 394_T2, 303_T1, 195_T1, 383_T1, 292_T1, 333_T1, 397_T1, 191_T1, 538_T1, 295_T1	372_T1, 361_T1
GNA13	GAIN.up	4.83167	0.110571	0.225	0.0555556	9	1	9	1	398_T1, 191_T1, 401_T1, 330_T1, 473_T1, 195_T1, 430_T1, 177_Prospective1, 496_T1	567_T1
CCND1	GAIN.up	2.65033	0.133189	0.35	0.166667	15	3	14	3	408_T1B, 408_T1A, 290_T2, 191_T1, 307_T1, 349_T1, 177_Prospective1, 338_T1, 315_T1, 430_T1, 299_T1, 459_Archival1, 568_T1, 496_T1, 538_T1	376_T2, 434_T1, 358_T1
FGF19	GAIN.up	2.65033	0.133189	0.35	0.166667	15	3	14	3	408_T1B, 408_T1A, 290_T2, 191_T1, 307_T1, 349_T1, 338_T1, 315_T1, 430_T1, 299_T1, 568_T1, 459_Archival1, 538_T1, 496_T1, 177_Prospective1	376_T2, 434_T1, 358_T1
FZD10	ACT.inc	Inf	0.143604	0.125	0	5	0	5	0	294_T2, 366_T2, 401_T1, 459_Archival1, 307_T1
FGFR4	GAIN.up	Inf	0.143604	0.125	0	5	0	5	0	195_T1, 391_T1, 430_T1, 401_T1, 386_T1
KSR2	GAIN.up	Inf	0.143604	0.125	0	5	0	5	0	307_T1, 303_T1, 430_T1, 177_Prospective1, 473_T1
NSD1	GAIN.up	Inf	0.143604	0.125	0	5	0	5	0	195_T1, 391_T1, 430_T1, 401_T1, 386_T1
E2F1	GAIN.up	Inf	0.143604	0.125	0	5	0	5	0	195_T1, 333_T1, 397_T1, 307_T1, 366_T2
MYC	ACT	4.1677	0.155671	0.2	0.0555556	8	1	8	1	307_T1, 195_T1, 191_T1, 385_T1, 386_T1, 346_T1, 473_T1, 329_T1	372_T1
DEPTOR	ACT	4.1677	0.155671	0.2	0.0555556	8	1	8	1	473_T1, 386_T1, 346_T1, 307_T1, 191_T1, 195_T1, 329_T1, 385_T1	372_T1
MYC	ACT.inc	4.1677	0.155671	0.2	0.0555556	8	1	8	1	307_T1, 195_T1, 191_T1, 385_T1, 386_T1, 346_T1, 473_T1, 329_T1	372_T1
MUC16	ACT.inc	4.1677	0.155671	0.2	0.0555556	9	1	8	1	195_T1, 292_T1, 295_T1, 303_T1, 331_T1, 350_T1, 366_T2, 408_T1A, 408_T1B	260_T1
NCOA2	ACT.inc	4.1677	0.155671	0.2	0.0555556	8	1	8	1	430_T1, 307_T1, 346_T1, 195_T1, 386_T1, 333_T1, 473_T1, 385_T1	260_T1
RECQL4	ACT.inc	4.1677	0.155671	0.2	0.0555556	8	1	8	1	307_T1, 331_T1, 195_T1, 346_T1, 386_T1, 473_T1, 329_T1, 385_T1	260_T1
MYC	AMP.up	4.1677	0.155671	0.2	0.0555556	8	1	8	1	307_T1, 195_T1, 191_T1, 385_T1, 386_T1, 346_T1, 473_T1, 329_T1	372_T1
DEPTOR	AMP.up	4.1677	0.155671	0.2	0.0555556	8	1	8	1	473_T1, 386_T1, 346_T1, 307_T1, 191_T1, 195_T1, 329_T1, 385_T1	372_T1
FGF4	ACT	2.62712	0.198354	0.25	0.111111	11	2	10	2	408_T1B, 408_T1A, 290_T2, 191_T1, 307_T1, 349_T1, 568_T1, 177_Prospective1, 496_T1, 299_T1, 459_Archival1	376_T2, 434_T1
FGF3	ACT.inc	2.62712	0.198354	0.25	0.111111	11	2	10	2	366_T2, 408_T1B, 408_T1A, 290_T2, 191_T1, 307_T1, 349_T1, 177_Prospective1, 459_Archival1, 568_T1, 496_T1	376_T2, 434_T1
FGF4	ACT.inc	2.62712	0.198354	0.25	0.111111	11	2	10	2	408_T1B, 408_T1A, 290_T2, 191_T1, 307_T1, 349_T1, 568_T1, 177_Prospective1, 496_T1, 299_T1, 459_Archival1	376_T2, 434_T1
FGF4	AMP.up	2.62712	0.198354	0.25	0.111111	11	2	10	2	408_T1B, 408_T1A, 290_T2, 191_T1, 307_T1, 349_T1, 568_T1, 177_Prospective1, 496_T1, 299_T1, 459_Archival1	376_T2, 434_T1
RUNX1T1	ACT	3.54284	0.215197	0.175	0.0555556	7	1	7	1	307_T1, 346_T1, 195_T1, 386_T1, 191_T1, 473_T1, 385_T1	376_T2
CDH17	ACT	3.54284	0.215197	0.175	0.0555556	7	1	7	1	307_T1, 346_T1, 195_T1, 386_T1, 191_T1, 473_T1, 385_T1	376_T2
HEY1	ACT	3.54284	0.215197	0.175	0.0555556	7	1	7	1	307_T1, 346_T1, 195_T1, 386_T1, 333_T1, 473_T1, 385_T1	376_T2
PABPC1	ACT	3.54284	0.215197	0.175	0.0555556	7	1	7	1	386_T1, 307_T1, 346_T1, 195_T1, 473_T1, 191_T1, 385_T1	372_T1
RUNX1T1	ACT.inc	3.54284	0.215197	0.175	0.0555556	7	1	7	1	307_T1, 346_T1, 195_T1, 386_T1, 191_T1, 473_T1, 385_T1	376_T2
UBR5	ACT.inc	3.54284	0.215197	0.175	0.0555556	7	1	7	1	538_T1, 307_T1, 386_T1, 346_T1, 195_T1, 191_T1, 385_T1	372_T1
HEY1	ACT.inc	3.54284	0.215197	0.175	0.0555556	7	1	7	1	307_T1, 346_T1, 195_T1, 386_T1, 333_T1, 473_T1, 385_T1	376_T2
PABPC1	ACT.inc	3.54284	0.215197	0.175	0.0555556	7	1	7	1	386_T1, 307_T1, 346_T1, 195_T1, 473_T1, 191_T1, 385_T1	372_T1
KAT6A	GAIN.up	3.54284	0.215197	0.175	0.0555556	7	1	7	1	195_T1, 333_T1, 307_T1, 329_T1, 381_T1, 294_T2, 535_T1	567_T1
LGR5	GAIN.up	3.54284	0.215197	0.175	0.0555556	7	1	7	1	430_T1, 329_T1, 303_T1, 333_T1, 473_T1, 397_T1, 366_T2	327_T1
RUNX1T1	AMP.up	3.54284	0.215197	0.175	0.0555556	7	1	7	1	307_T1, 346_T1, 195_T1, 386_T1, 191_T1, 473_T1, 385_T1	376_T2
CDH17	AMP.up	3.54284	0.215197	0.175	0.0555556	7	1	7	1	307_T1, 346_T1, 195_T1, 386_T1, 191_T1, 473_T1, 385_T1	376_T2
HEY1	AMP.up	3.54284	0.215197	0.175	0.0555556	7	1	7	1	307_T1, 346_T1, 195_T1, 386_T1, 333_T1, 473_T1, 385_T1	376_T2
PABPC1	AMP.up	3.54284	0.215197	0.175	0.0555556	7	1	7	1	386_T1, 307_T1, 346_T1, 195_T1, 473_T1, 191_T1, 385_T1	372_T1
KMT2C	HOMDEL	Inf	0.215405	0.1	0	4	0	4	0	330_T1, 338_T1, 381_T1, 349_T1
RB1	HOMDEL	Inf	0.215405	0.1	0	4	0	4	0	333_T1, 391_T1, 185_T1, 295_T1
PRKAR1A	ACT	Inf	0.215405	0.1	0	4	0	4	0	430_T1, 191_T1, 401_T1, 177_Prospective1
MSI2	ACT.inc	Inf	0.215405	0.1	0	4	0	4	0	430_T1, 401_T1, 330_T1, 473_T1
NCOA3	ACT.inc	Inf	0.215405	0.1	0	4	0	4	0	185_T1, 366_T2, 473_T1, 394_T2
SRC	ACT.inc	Inf	0.215405	0.1	0	4	0	4	0	338_T1, 401_T1, 394_T2, 538_T1
ARHGAP5	ACT.inc	Inf	0.215405	0.1	0	5	0	4	0	366_T2, 401_T1, 408_T1B, 408_T1A, 307_T1
PRKAR1A	ACT.inc	Inf	0.215405	0.1	0	4	0	4	0	430_T1, 191_T1, 401_T1, 177_Prospective1
LRP5	ACT.inc	Inf	0.215405	0.1	0	4	0	4	0	366_T2, 383_T1, 307_T1, 459_Archival1
CDK4	GAIN.up	Inf	0.215405	0.1	0	4	0	4	0	397_T1, 303_T1, 430_T1, 295_T1
DEK	GAIN.up	Inf	0.215405	0.1	0	4	0	4	0	185_T1, 397_T1, 401_T1, 366_T2
E2F3	GAIN.up	Inf	0.215405	0.1	0	4	0	4	0	185_T1, 397_T1, 401_T1, 366_T2
ESR1	GAIN.up	Inf	0.215405	0.1	0	4	0	4	0	307_T1, 195_T1, 185_T1, 397_T1
FLT4	GAIN.up	Inf	0.215405	0.1	0	4	0	4	0	195_T1, 430_T1, 391_T1, 386_T1
IGF1R	GAIN.up	Inf	0.215405	0.1	0	4	0	4	0	338_T1, 386_T1, 349_T1, 496_T1
IL7R	GAIN.up	Inf	0.215405	0.1	0	5	0	4	0	307_T1, 408_T1B, 383_T1, 408_T1A, 386_T1
JARID2	GAIN.up	Inf	0.215405	0.1	0	4	0	4	0	185_T1, 397_T1, 401_T1, 366_T2
RICTOR	GAIN.up	Inf	0.215405	0.1	0	5	0	4	0	307_T1, 408_T1B, 383_T1, 408_T1A, 386_T1
TERT	GAIN.up	Inf	0.215405	0.1	0	5	0	4	0	408_T1B, 386_T1, 333_T1, 408_T1A, 383_T1
TLX3	GAIN.up	Inf	0.215405	0.1	0	4	0	4	0	195_T1, 430_T1, 401_T1, 386_T1
VEGFA	GAIN.up	Inf	0.215405	0.1	0	4	0	4	0	383_T1, 401_T1, 397_T1, 366_T2
NPM1	GAIN.up	Inf	0.215405	0.1	0	4	0	4	0	195_T1, 430_T1, 401_T1, 386_T1
TBX3	GAIN.up	Inf	0.215405	0.1	0	4	0	4	0	430_T1, 473_T1, 303_T1, 177_Prospective1
PRKAR1A	AMP.up	Inf	0.215405	0.1	0	4	0	4	0	430_T1, 191_T1, 401_T1, 177_Prospective1
MUC4	GAIN.up	3.44106	0.225583	0.175	0.0555556	7	1	7	1	290_T2, 331_T1, 303_T1, 346_T1, 408_T1B, 195_T1, 177_Prospective1	358_T1
FGF3	ACT	2.29262	0.260904	0.225	0.111111	10	2	9	2	408_T1B, 408_T1A, 290_T2, 191_T1, 307_T1, 349_T1, 177_Prospective1, 459_Archival1, 568_T1, 496_T1	376_T2, 434_T1
RAD21	ACT	2.29262	0.260904	0.225	0.111111	9	2	9	2	346_T1, 307_T1, 191_T1, 195_T1, 386_T1, 473_T1, 350_T1, 329_T1, 385_T1	372_T1, 387_T1
RAD21	ACT.inc	2.29262	0.260904	0.225	0.111111	9	2	9	2	346_T1, 307_T1, 191_T1, 195_T1, 386_T1, 473_T1, 350_T1, 329_T1, 385_T1	372_T1, 387_T1
DDX5	GAIN.up	2.29262	0.260904	0.225	0.111111	9	2	9	2	473_T1, 191_T1, 430_T1, 398_T1, 401_T1, 195_T1, 292_T1, 177_Prospective1, 496_T1	327_T1, 567_T1
FGF3	AMP.up	2.29262	0.260904	0.225	0.111111	10	2	9	2	408_T1B, 408_T1A, 290_T2, 191_T1, 307_T1, 349_T1, 177_Prospective1, 459_Archival1, 568_T1, 496_T1	376_T2, 434_T1
RAD21	AMP.up	2.29262	0.260904	0.225	0.111111	9	2	9	2	346_T1, 307_T1, 191_T1, 195_T1, 386_T1, 473_T1, 350_T1, 329_T1, 385_T1	372_T1, 387_T1
LYN	ACT	2.95368	0.291792	0.15	0.0555556	6	1	6	1	346_T1, 195_T1, 333_T1, 307_T1, 386_T1, 385_T1	361_T1
UBR5	ACT	2.95368	0.291792	0.15	0.0555556	6	1	6	1	307_T1, 386_T1, 346_T1, 195_T1, 191_T1, 385_T1	372_T1
CCNE2	ACT	2.95368	0.291792	0.15	0.0555556	6	1	6	1	307_T1, 346_T1, 195_T1, 386_T1, 473_T1, 385_T1	376_T2
PLAG1	ACT	2.95368	0.291792	0.15	0.0555556	6	1	6	1	346_T1, 195_T1, 333_T1, 386_T1, 307_T1, 385_T1	361_T1
LYN	ACT.inc	2.95368	0.291792	0.15	0.0555556	6	1	6	1	346_T1, 195_T1, 333_T1, 307_T1, 386_T1, 385_T1	361_T1
CCNE2	ACT.inc	2.95368	0.291792	0.15	0.0555556	6	1	6	1	307_T1, 346_T1, 195_T1, 386_T1, 473_T1, 385_T1	376_T2
PLAG1	ACT.inc	2.95368	0.291792	0.15	0.0555556	6	1	6	1	346_T1, 195_T1, 333_T1, 386_T1, 307_T1, 385_T1	361_T1
MDM2	GAIN.up	2.95368	0.291792	0.15	0.0555556	6	1	6	1	397_T1, 430_T1, 329_T1, 473_T1, 333_T1, 366_T2	327_T1
GRB2	GAIN.up	2.95368	0.291792	0.15	0.0555556	6	1	6	1	338_T1, 307_T1, 401_T1, 195_T1, 177_Prospective1, 496_T1	567_T1
LYN	AMP.up	2.95368	0.291792	0.15	0.0555556	6	1	6	1	346_T1, 195_T1, 333_T1, 307_T1, 386_T1, 385_T1	361_T1
UBR5	AMP.up	2.95368	0.291792	0.15	0.0555556	6	1	6	1	307_T1, 386_T1, 346_T1, 195_T1, 191_T1, 385_T1	372_T1
CCNE2	AMP.up	2.95368	0.291792	0.15	0.0555556	6	1	6	1	307_T1, 346_T1, 195_T1, 386_T1, 473_T1, 385_T1	376_T2
PLAG1	AMP.up	2.95368	0.291792	0.15	0.0555556	6	1	6	1	346_T1, 195_T1, 333_T1, 386_T1, 307_T1, 385_T1	361_T1
BRCA2	HOMDEL	Inf	0.320197	0.075	0	3	0	3	0	303_T1, 295_T1, 299_T1
HLA-B	HOMDEL	Inf	0.320197	0.075	0	3	0	3	0	315_T1, 386_T1, 177_Prospective1
SMAD4	HOMDEL	Inf	0.320197	0.075	0	3	0	3	0	473_T1, 385_T1, 299_T1
FGFR2	ACT	Inf	0.320197	0.075	0	3	0	3	0	350_T1, 307_T1, 346_T1
IGF1R	ACT	Inf	0.320197	0.075	0	3	0	3	0	338_T1, 386_T1, 496_T1
MSI2	ACT	Inf	0.320197	0.075	0	3	0	3	0	401_T1, 330_T1, 473_T1
RPTOR	ACT	Inf	0.320197	0.075	0	3	0	3	0	307_T1, 398_T1, 177_Prospective1
HLF	ACT	Inf	0.320197	0.075	0	3	0	3	0	430_T1, 330_T1, 473_T1
IKBKB	ACT	Inf	0.320197	0.075	0	3	0	3	0	195_T1, 333_T1, 307_T1
TEAD2	ACT	Inf	0.320197	0.075	0	3	0	3	0	307_T1, 386_T1, 177_Prospective1
CDK4	ACT.inc	Inf	0.320197	0.075	0	3	0	3	0	295_T1, 303_T1, 430_T1
EGFR	ACT.inc	Inf	0.320197	0.075	0	3	0	3	0	195_T1, 385_T1, 538_T1
FGFR2	ACT.inc	Inf	0.320197	0.075	0	3	0	3	0	350_T1, 307_T1, 346_T1
RPTOR	ACT.inc	Inf	0.320197	0.075	0	3	0	3	0	307_T1, 398_T1, 177_Prospective1
ATP1A1	ACT.inc	Inf	0.320197	0.075	0	3	0	3	0	292_T1, 331_T1, 366_T2
CREBBP	ACT.inc	Inf	0.320197	0.075	0	3	0	3	0	538_T1, 195_T1, 350_T1
HLF	ACT.inc	Inf	0.320197	0.075	0	3	0	3	0	430_T1, 330_T1, 473_T1
IKBKB	ACT.inc	Inf	0.320197	0.075	0	3	0	3	0	195_T1, 333_T1, 307_T1
MLLT4	ACT.inc	Inf	0.320197	0.075	0	3	0	3	0	338_T1, 366_T2, 568_T1
MUC4	ACT.inc	Inf	0.320197	0.075	0	3	0	3	0	185_T1, 330_T1, 290_T2
SND1	ACT.inc	Inf	0.320197	0.075	0	3	0	3	0	330_T1, 331_T1, 366_T2
FGFR2	GAIN.up	Inf	0.320197	0.075	0	3	0	3	0	307_T1, 350_T1, 346_T1
HIST1H1E	GAIN.up	Inf	0.320197	0.075	0	3	0	3	0	397_T1, 366_T2, 401_T1
IGF1	GAIN.up	Inf	0.320197	0.075	0	3	0	3	0	473_T1, 303_T1, 177_Prospective1
IRF4	GAIN.up	Inf	0.320197	0.075	0	3	0	3	0	386_T1, 397_T1, 366_T2
LTB	GAIN.up	Inf	0.320197	0.075	0	3	0	3	0	195_T1, 366_T2, 401_T1
MSI1	GAIN.up	Inf	0.320197	0.075	0	3	0	3	0	307_T1, 177_Prospective1, 303_T1
PDGFRB	GAIN.up	Inf	0.320197	0.075	0	3	0	3	0	195_T1, 473_T1, 386_T1
RAB35	GAIN.up	Inf	0.320197	0.075	0	3	0	3	0	307_T1, 303_T1, 177_Prospective1
RRAS	GAIN.up	Inf	0.320197	0.075	0	3	0	3	0	177_Prospective1, 386_T1, 315_T1
BCL11B	GAIN.up	Inf	0.320197	0.075	0	3	0	3	0	430_T1, 349_T1, 177_Prospective1
BCL2L12	GAIN.up	Inf	0.320197	0.075	0	3	0	3	0	386_T1, 315_T1, 177_Prospective1
CD74	GAIN.up	Inf	0.320197	0.075	0	3	0	3	0	195_T1, 473_T1, 386_T1
CHST11	GAIN.up	Inf	0.320197	0.075	0	3	0	3	0	473_T1, 303_T1, 177_Prospective1
CSF1R	GAIN.up	Inf	0.320197	0.075	0	3	0	3	0	195_T1, 473_T1, 386_T1
CTNND2	GAIN.up	Inf	0.320197	0.075	0	4	0	3	0	307_T1, 408_T1B, 408_T1A, 383_T1
DGCR8	GAIN.up	Inf	0.320197	0.075	0	3	0	3	0	346_T1, 307_T1, 459_Archival1
HIST1H3B	GAIN.up	Inf	0.320197	0.075	0	3	0	3	0	331_T1, 397_T1, 401_T1
HMGA1	GAIN.up	Inf	0.320197	0.075	0	3	0	3	0	401_T1, 397_T1, 191_T1
HMGA2	GAIN.up	Inf	0.320197	0.075	0	3	0	3	0	473_T1, 397_T1, 366_T2
POU5F1	GAIN.up	Inf	0.320197	0.075	0	3	0	3	0	397_T1, 401_T1, 366_T2
SUZ12	GAIN.up	Inf	0.320197	0.075	0	3	0	3	0	346_T1, 386_T1, 496_T1
TRIM27	GAIN.up	Inf	0.320197	0.075	0	3	0	3	0	397_T1, 401_T1, 366_T2
TEAD2	GAIN.up	Inf	0.320197	0.075	0	3	0	3	0	307_T1, 386_T1, 177_Prospective1
FGFR2	AMP.up	Inf	0.320197	0.075	0	3	0	3	0	307_T1, 350_T1, 346_T1
IGF1R	AMP.up	Inf	0.320197	0.075	0	3	0	3	0	338_T1, 386_T1, 496_T1
MSI2	AMP.up	Inf	0.320197	0.075	0	3	0	3	0	401_T1, 330_T1, 473_T1
RPTOR	AMP.up	Inf	0.320197	0.075	0	3	0	3	0	307_T1, 398_T1, 177_Prospective1
HLF	AMP.up	Inf	0.320197	0.075	0	3	0	3	0	430_T1, 330_T1, 473_T1
IKBKB	AMP.up	Inf	0.320197	0.075	0	3	0	3	0	195_T1, 333_T1, 307_T1
TEAD2	AMP.up	Inf	0.320197	0.075	0	3	0	3	0	307_T1, 386_T1, 177_Prospective1
ER	IHC loss	Inf	0.320197	0.075	0	3	0	3	0	331_T1, 330_T1, 391_T1
AKT1	GAIN.up	Inf	0.327909	0.075	0	3	0	3	0	408_T1B, 331_T1, 177_Prospective1
DEPTOR	ACT.inc	1.97842	0.33607	0.2	0.111111	8	2	8	2	473_T1, 386_T1, 346_T1, 307_T1, 191_T1, 195_T1, 329_T1, 385_T1	516_T1, 372_T1
HLF	GAIN.up	1.97842	0.33607	0.2	0.111111	8	2	8	2	430_T1, 330_T1, 473_T1, 191_T1, 195_T1, 307_T1, 303_T1, 496_T1	327_T1, 567_T1
PRKAR1A	GAIN.up	1.97842	0.33607	0.2	0.111111	8	2	8	2	430_T1, 191_T1, 401_T1, 473_T1, 195_T1, 398_T1, 177_Prospective1, 496_T1	387_T1, 327_T1
CCND1	ACT	1.65285	0.366967	0.25	0.166667	11	3	10	3	408_T1B, 408_T1A, 290_T2, 191_T1, 307_T1, 349_T1, 177_Prospective1, 299_T1, 459_Archival1, 568_T1, 496_T1	376_T2, 434_T1, 358_T1
FGF19	ACT	1.65285	0.366967	0.25	0.166667	11	3	10	3	408_T1B, 408_T1A, 290_T2, 191_T1, 307_T1, 349_T1, 299_T1, 568_T1, 459_Archival1, 496_T1, 177_Prospective1	376_T2, 434_T1, 358_T1
CCND1	ACT.inc	1.65285	0.366967	0.25	0.166667	11	3	10	3	408_T1B, 408_T1A, 290_T2, 191_T1, 307_T1, 349_T1, 177_Prospective1, 299_T1, 459_Archival1, 568_T1, 496_T1	376_T2, 434_T1, 358_T1
FGF19	ACT.inc	1.65285	0.366967	0.25	0.166667	11	3	10	3	408_T1B, 408_T1A, 290_T2, 191_T1, 307_T1, 349_T1, 299_T1, 568_T1, 459_Archival1, 496_T1, 177_Prospective1	376_T2, 434_T1, 358_T1
CCND1	AMP.up	1.65285	0.366967	0.25	0.166667	11	3	10	3	408_T1B, 408_T1A, 290_T2, 191_T1, 307_T1, 349_T1, 177_Prospective1, 299_T1, 459_Archival1, 568_T1, 496_T1	376_T2, 434_T1, 358_T1
FGF19	AMP.up	1.65285	0.366967	0.25	0.166667	11	3	10	3	408_T1B, 408_T1A, 290_T2, 191_T1, 307_T1, 349_T1, 299_T1, 568_T1, 459_Archival1, 496_T1, 177_Prospective1	376_T2, 434_T1, 358_T1
FZD6	ACT	2.39718	0.387459	0.125	0.0555556	5	1	5	1	307_T1, 346_T1, 386_T1, 195_T1, 385_T1	372_T1
ERBB2	ACT.inc	2.39718	0.387459	0.125	0.0555556	5	1	5	1	315_T1, 349_T1, 366_T2, 397_T1, 391_T1	387_T1
GNA13	ACT.inc	2.39718	0.387459	0.125	0.0555556	5	1	5	1	366_T2, 398_T1, 191_T1, 401_T1, 177_Prospective1	567_T1
KAT6A	ACT.inc	2.39718	0.387459	0.125	0.0555556	5	1	5	1	295_T1, 401_T1, 195_T1, 333_T1, 307_T1	567_T1
FZD6	ACT.inc	2.39718	0.387459	0.125	0.0555556	5	1	5	1	307_T1, 346_T1, 386_T1, 195_T1, 385_T1	372_T1
SOX9	GAIN.up	2.39718	0.387459	0.125	0.0555556	5	1	5	1	401_T1, 195_T1, 307_T1, 496_T1, 177_Prospective1	567_T1
FZD6	AMP.up	2.39718	0.387459	0.125	0.0555556	5	1	5	1	307_T1, 346_T1, 386_T1, 195_T1, 385_T1	372_T1
PREX2	GAIN.up	1.4899	0.39085	0.3	0.222222	12	4	12	4	195_T1, 473_T1, 307_T1, 346_T1, 333_T1, 386_T1, 385_T1, 303_T1, 329_T1, 381_T1, 294_T2, 299_T1	452_T2, 361_T1, 387_T1, 614_T1
DEPTOR	GAIN.up	1.39207	0.410597	0.35	0.277778	14	5	14	5	473_T1, 386_T1, 346_T1, 307_T1, 191_T1, 195_T1, 329_T1, 385_T1, 383_T1, 303_T1, 333_T1, 185_T1, 381_T1, 299_T1	372_T1, 452_T2, 387_T1, 358_T1, 614_T1
CDH17	ACT.inc	1.6827	0.423537	0.175	0.111111	7	2	7	2	307_T1, 346_T1, 195_T1, 386_T1, 191_T1, 473_T1, 385_T1	314_T1, 376_T2
RAD21	GAIN.up	1.32681	0.427748	0.4	0.333333	16	6	16	6	346_T1, 307_T1, 191_T1, 195_T1, 386_T1, 473_T1, 350_T1, 329_T1, 385_T1, 383_T1, 303_T1, 333_T1, 185_T1, 381_T1, 294_T2, 299_T1	372_T1, 387_T1, 452_T2, 361_T1, 358_T1, 614_T1
TNFRSF17	GAIN.up	1.44271	0.448553	0.225	0.166667	9	3	9	3	330_T1, 195_T1, 350_T1, 346_T1, 383_T1, 294_T2, 381_T1, 401_T1, 366_T2	361_T1, 306_T1, 515_T1
CD79B	GAIN.up	1.32128	0.468262	0.275	0.222222	11	4	11	4	191_T1, 473_T1, 430_T1, 398_T1, 401_T1, 330_T1, 185_T1, 195_T1, 292_T1, 177_Prospective1, 496_T1	327_T1, 387_T1, 358_T1, 567_T1
LYN	GAIN.up	1.32128	0.468262	0.275	0.222222	11	4	11	4	346_T1, 195_T1, 333_T1, 307_T1, 386_T1, 385_T1, 473_T1, 299_T1, 329_T1, 381_T1, 294_T2	361_T1, 452_T2, 387_T1, 614_T1
NCOA2	GAIN.up	1.32128	0.468262	0.275	0.222222	11	4	11	4	307_T1, 346_T1, 195_T1, 386_T1, 333_T1, 473_T1, 385_T1, 329_T1, 381_T1, 294_T2, 299_T1	452_T2, 361_T1, 387_T1, 614_T1
PLAG1	GAIN.up	1.32128	0.468262	0.275	0.222222	11	4	11	4	346_T1, 195_T1, 333_T1, 386_T1, 307_T1, 385_T1, 473_T1, 329_T1, 381_T1, 294_T2, 299_T1	361_T1, 452_T2, 387_T1, 614_T1
ASXL2	HOMDEL	Inf	0.471869	0.05	0	2	0	2	0	292_T1, 459_Archival1
BRCA1	HOMDEL	Inf	0.471869	0.05	0	2	0	2	0	349_T1, 292_T1
CDKN2A	HOMDEL	Inf	0.471869	0.05	0	2	0	2	0	401_T1, 535_T1
EP400	HOMDEL	Inf	0.471869	0.05	0	2	0	2	0	568_T1, 366_T2
SETD2	HOMDEL	Inf	0.471869	0.05	0	2	0	2	0	349_T1, 290_T2
CLTCL1	HOMDEL	Inf	0.471869	0.05	0	2	0	2	0	459_Archival1, 295_T1
MYH9	HOMDEL	Inf	0.471869	0.05	0	2	0	2	0	394_T2, 366_T2
NCOR2	HOMDEL	Inf	0.471869	0.05	0	2	0	2	0	185_T1, 366_T2
MAML3	HOMDEL	Inf	0.471869	0.05	0	2	0	2	0	307_T1, 398_T1
CDK4	ACT	Inf	0.471869	0.05	0	2	0	2	0	303_T1, 430_T1
KRAS	ACT	Inf	0.471869	0.05	0	2	0	2	0	331_T1, 430_T1
KSR2	ACT	Inf	0.471869	0.05	0	2	0	2	0	307_T1, 303_T1
MAPK3	ACT	Inf	0.471869	0.05	0	2	0	2	0	195_T1, 350_T1
NCOA3	ACT	Inf	0.471869	0.05	0	2	0	2	0	473_T1, 394_T2
SETD1A	ACT	Inf	0.471869	0.05	0	2	0	2	0	195_T1, 350_T1
SRC	ACT	Inf	0.471869	0.05	0	2	0	2	0	394_T2, 538_T1
ARHGAP5	ACT	Inf	0.471869	0.05	0	3	0	2	0	408_T1B, 408_T1A, 307_T1
BCL2L12	ACT	Inf	0.471869	0.05	0	2	0	2	0	386_T1, 177_Prospective1
CREBBP	ACT	Inf	0.471869	0.05	0	2	0	2	0	195_T1, 350_T1
MYOD1	ACT	Inf	0.471869	0.05	0	2	0	2	0	307_T1, 568_T1
MLST8	ACT	Inf	0.471869	0.05	0	2	0	2	0	195_T1, 350_T1
LRP5	ACT	Inf	0.471869	0.05	0	2	0	2	0	307_T1, 459_Archival1
BCR	ACT.inc	Inf	0.471869	0.05	0	2	0	2	0	366_T2, 394_T2
BRAF	ACT.inc	Inf	0.471869	0.05	0	2	0	2	0	366_T2, 538_T1
JAK1	ACT.inc	Inf	0.471869	0.05	0	2	0	2	0	331_T1, 386_T1
JAK2	ACT.inc	Inf	0.471869	0.05	0	2	0	2	0	366_T2, 385_T1
KDR	ACT.inc	Inf	0.471869	0.05	0	2	0	2	0	366_T2, 398_T1
KRAS	ACT.inc	Inf	0.471869	0.05	0	2	0	2	0	331_T1, 430_T1
KSR2	ACT.inc	Inf	0.471869	0.05	0	2	0	2	0	307_T1, 303_T1
MAPK3	ACT.inc	Inf	0.471869	0.05	0	2	0	2	0	195_T1, 350_T1
MET	ACT.inc	Inf	0.471869	0.05	0	2	0	2	0	366_T2, 386_T1
NOTCH1	ACT.inc	Inf	0.471869	0.05	0	2	0	2	0	299_T1, 430_T1
NTRK3	ACT.inc	Inf	0.471869	0.05	0	2	0	2	0	292_T1, 338_T1
RAB35	ACT.inc	Inf	0.471869	0.05	0	2	0	2	0	366_T2, 307_T1
ROS1	ACT.inc	Inf	0.471869	0.05	0	2	0	2	0	366_T2, 386_T1
SETD1A	ACT.inc	Inf	0.471869	0.05	0	2	0	2	0	195_T1, 350_T1
BCL11B	ACT.inc	Inf	0.471869	0.05	0	2	0	2	0	366_T2, 430_T1
BCL2L12	ACT.inc	Inf	0.471869	0.05	0	2	0	2	0	386_T1, 177_Prospective1
DGCR8	ACT.inc	Inf	0.471869	0.05	0	3	0	2	0	366_T2, 408_T1A, 408_T1B
GRM3	ACT.inc	Inf	0.471869	0.05	0	2	0	2	0	366_T2, 381_T1
HIP1	ACT.inc	Inf	0.471869	0.05	0	2	0	2	0	331_T1, 366_T2
KMT2D	ACT.inc	Inf	0.471869	0.05	0	2	0	2	0	366_T2, 381_T1
MYOD1	ACT.inc	Inf	0.471869	0.05	0	2	0	2	0	307_T1, 568_T1
POLQ	ACT.inc	Inf	0.471869	0.05	0	2	0	2	0	331_T1, 366_T2
PRDM16	ACT.inc	Inf	0.471869	0.05	0	2	0	2	0	195_T1, 331_T1
SALL4	ACT.inc	Inf	0.471869	0.05	0	2	0	2	0	349_T1, 366_T2
ZNF521	ACT.inc	Inf	0.471869	0.05	0	2	0	2	0	459_Archival1, 307_T1
MLST8	ACT.inc	Inf	0.471869	0.05	0	2	0	2	0	195_T1, 350_T1
CCND3	GAIN.up	Inf	0.471869	0.05	0	2	0	2	0	401_T1, 397_T1
CRKL	GAIN.up	Inf	0.471869	0.05	0	2	0	2	0	349_T1, 346_T1
FYN	GAIN.up	Inf	0.471869	0.05	0	2	0	2	0	185_T1, 397_T1
IDH2	GAIN.up	Inf	0.471869	0.05	0	2	0	2	0	338_T1, 349_T1
KDR	GAIN.up	Inf	0.471869	0.05	0	2	0	2	0	386_T1, 195_T1
KIT	GAIN.up	Inf	0.471869	0.05	0	2	0	2	0	386_T1, 195_T1
KRAS	GAIN.up	Inf	0.471869	0.05	0	2	0	2	0	397_T1, 535_T1
MEF2B	GAIN.up	Inf	0.471869	0.05	0	2	0	2	0	177_Prospective1, 568_T1
MLLT10	GAIN.up	Inf	0.471869	0.05	0	2	0	2	0	331_T1, 299_T1
NRAS	GAIN.up	Inf	0.471869	0.05	0	2	0	2	0	290_T2, 397_T1
NTRK3	GAIN.up	Inf	0.471869	0.05	0	2	0	2	0	338_T1, 349_T1
PDGFRA	GAIN.up	Inf	0.471869	0.05	0	2	0	2	0	386_T1, 195_T1
ROS1	GAIN.up	Inf	0.471869	0.05	0	2	0	2	0	185_T1, 397_T1
SGK1	GAIN.up	Inf	0.471869	0.05	0	2	0	2	0	185_T1, 397_T1
WT1	GAIN.up	Inf	0.471869	0.05	0	3	0	2	0	408_T1B, 408_T1A, 568_T1
ARHGAP5	GAIN.up	Inf	0.471869	0.05	0	3	0	2	0	408_T1B, 408_T1A, 307_T1
ATP1A1	GAIN.up	Inf	0.471869	0.05	0	2	0	2	0	397_T1, 290_T2
CCR4	GAIN.up	Inf	0.471869	0.05	0	2	0	2	0	473_T1, 294_T2
CCR7	GAIN.up	Inf	0.471869	0.05	0	2	0	2	0	330_T1, 496_T1
CDKN1A	GAIN.up	Inf	0.471869	0.05	0	2	0	2	0	401_T1, 397_T1
DAXX	GAIN.up	Inf	0.471869	0.05	0	2	0	2	0	401_T1, 397_T1
EPAS1	GAIN.up	Inf	0.471869	0.05	0	2	0	2	0	292_T1, 473_T1
FOXO3	GAIN.up	Inf	0.471869	0.05	0	2	0	2	0	185_T1, 397_T1
LMO2	GAIN.up	Inf	0.471869	0.05	0	3	0	2	0	408_T1B, 408_T1A, 568_T1
MN1	GAIN.up	Inf	0.471869	0.05	0	2	0	2	0	307_T1, 185_T1
MYB	GAIN.up	Inf	0.471869	0.05	0	2	0	2	0	185_T1, 397_T1
MYOD1	GAIN.up	Inf	0.471869	0.05	0	2	0	2	0	307_T1, 568_T1
NKX2-1	GAIN.up	Inf	0.471869	0.05	0	2	0	2	0	473_T1, 307_T1
PIM1	GAIN.up	Inf	0.471869	0.05	0	2	0	2	0	401_T1, 397_T1
RARA	GAIN.up	Inf	0.471869	0.05	0	2	0	2	0	330_T1, 496_T1
RSPO3	GAIN.up	Inf	0.471869	0.05	0	2	0	2	0	185_T1, 397_T1
SIX2	GAIN.up	Inf	0.471869	0.05	0	2	0	2	0	292_T1, 473_T1
SRSF3	GAIN.up	Inf	0.471869	0.05	0	2	0	2	0	401_T1, 397_T1
TAF15	GAIN.up	Inf	0.471869	0.05	0	2	0	2	0	346_T1, 496_T1
TEC	GAIN.up	Inf	0.471869	0.05	0	2	0	2	0	386_T1, 195_T1
TFEB	GAIN.up	Inf	0.471869	0.05	0	2	0	2	0	401_T1, 397_T1
ZNF521	GAIN.up	Inf	0.471869	0.05	0	2	0	2	0	307_T1, 606_T1
TEAD3	GAIN.up	Inf	0.471869	0.05	0	2	0	2	0	401_T1, 397_T1
MLXIP	GAIN.up	Inf	0.471869	0.05	0	2	0	2	0	307_T1, 177_Prospective1
FZD10	GAIN.up	Inf	0.471869	0.05	0	2	0	2	0	307_T1, 177_Prospective1
WNT7A	GAIN.up	Inf	0.471869	0.05	0	3	0	2	0	408_T1B, 408_T1A, 473_T1
DNMT3A	GAIN.up	Inf	0.471869	0.05	0	2	0	2	0	185_T1, 473_T1
CDK4	AMP.up	Inf	0.471869	0.05	0	2	0	2	0	303_T1, 430_T1
ESR1	AMP.up	Inf	0.471869	0.05	0	2	0	2	0	307_T1, 185_T1
KSR2	AMP.up	Inf	0.471869	0.05	0	2	0	2	0	307_T1, 303_T1
MAPK3	AMP.up	Inf	0.471869	0.05	0	2	0	2	0	195_T1, 350_T1
NCOA3	AMP.up	Inf	0.471869	0.05	0	2	0	2	0	473_T1, 394_T2
SETD1A	AMP.up	Inf	0.471869	0.05	0	2	0	2	0	195_T1, 350_T1
SRC	AMP.up	Inf	0.471869	0.05	0	2	0	2	0	394_T2, 538_T1
ARHGAP5	AMP.up	Inf	0.471869	0.05	0	3	0	2	0	408_T1B, 408_T1A, 307_T1
BCL2L12	AMP.up	Inf	0.471869	0.05	0	2	0	2	0	386_T1, 177_Prospective1
CREBBP	AMP.up	Inf	0.471869	0.05	0	2	0	2	0	195_T1, 350_T1
MYOD1	AMP.up	Inf	0.471869	0.05	0	2	0	2	0	307_T1, 568_T1
MLST8	AMP.up	Inf	0.471869	0.05	0	2	0	2	0	195_T1, 350_T1
LRP5	AMP.up	Inf	0.471869	0.05	0	2	0	2	0	307_T1, 459_Archival1
WT1	ACT.inc	Inf	0.479252	0.05	0	2	0	2	0	366_T2, 408_T1B
AKT1	AMP.up	Inf	0.479252	0.05	0	2	0	2	0	408_T1B, 331_T1
RUNX1T1	GAIN.up	1.24709	0.485063	0.325	0.277778	13	5	13	5	307_T1, 346_T1, 195_T1, 386_T1, 191_T1, 473_T1, 385_T1, 333_T1, 185_T1, 329_T1, 381_T1, 294_T2, 299_T1	376_T2, 452_T2, 387_T1, 358_T1, 614_T1
UBR5	GAIN.up	1.24709	0.485063	0.325	0.277778	13	5	13	5	307_T1, 386_T1, 346_T1, 195_T1, 191_T1, 385_T1, 473_T1, 333_T1, 185_T1, 329_T1, 381_T1, 294_T2, 299_T1	372_T1, 452_T2, 387_T1, 358_T1, 614_T1
CCNE2	GAIN.up	1.24709	0.485063	0.325	0.277778	13	5	13	5	307_T1, 346_T1, 195_T1, 386_T1, 473_T1, 385_T1, 191_T1, 333_T1, 185_T1, 329_T1, 381_T1, 294_T2, 299_T1	376_T2, 452_T2, 387_T1, 358_T1, 614_T1
CDH17	GAIN.up	1.24709	0.485063	0.325	0.277778	13	5	13	5	185_T1, 307_T1, 346_T1, 195_T1, 386_T1, 191_T1, 473_T1, 385_T1, 333_T1, 329_T1, 381_T1, 294_T2, 299_T1	376_T2, 452_T2, 387_T1, 358_T1, 614_T1
PABPC1	GAIN.up	1.24709	0.485063	0.325	0.277778	13	5	13	5	386_T1, 307_T1, 346_T1, 195_T1, 473_T1, 191_T1, 385_T1, 333_T1, 185_T1, 329_T1, 381_T1, 294_T2, 299_T1	372_T1, 452_T2, 387_T1, 358_T1, 614_T1
FZD6	GAIN.up	1.24709	0.485063	0.325	0.277778	13	5	13	5	307_T1, 346_T1, 185_T1, 386_T1, 195_T1, 385_T1, 473_T1, 333_T1, 191_T1, 329_T1, 381_T1, 294_T2, 299_T1	372_T1, 452_T2, 387_T1, 358_T1, 614_T1
AKT1	ACT	1.87055	0.502612	0.1	0.0555556	5	1	4	1	381_T1, 408_T1A, 408_T1B, 538_T1, 331_T1	552_T1
GNA13	ACT	1.87055	0.502612	0.1	0.0555556	4	1	4	1	398_T1, 191_T1, 401_T1, 177_Prospective1	567_T1
FCGR2B	ACT	1.87055	0.502612	0.1	0.0555556	4	1	4	1	290_T2, 397_T1, 394_T2, 350_T1	452_T2
AKT1	ACT.inc	1.87055	0.502612	0.1	0.0555556	5	1	4	1	381_T1, 408_T1A, 408_T1B, 538_T1, 331_T1	552_T1
IGF1R	ACT.inc	1.87055	0.502612	0.1	0.0555556	4	1	4	1	292_T1, 338_T1, 386_T1, 496_T1	515_T1
NOTCH2	ACT.inc	1.87055	0.502612	0.1	0.0555556	4	1	4	1	331_T1, 381_T1, 386_T1, 350_T1	532_T1
RFWD2	ACT.inc	1.87055	0.502612	0.1	0.0555556	4	1	4	1	366_T2, 391_T1, 397_T1, 606_T1	452_T2
SETDB1	ACT.inc	1.87055	0.502612	0.1	0.0555556	4	1	4	1	386_T1, 473_T1, 397_T1, 350_T1	452_T2
FCGR2B	ACT.inc	1.87055	0.502612	0.1	0.0555556	4	1	4	1	290_T2, 397_T1, 394_T2, 350_T1	452_T2
ERBB2	GAIN.up	1.87055	0.502612	0.1	0.0555556	4	1	4	1	391_T1, 401_T1, 346_T1, 496_T1	387_T1
NOTCH2	GAIN.up	1.87055	0.502612	0.1	0.0555556	4	1	4	1	350_T1, 290_T2, 397_T1, 381_T1	372_T1
HNRNPA2B1	GAIN.up	1.87055	0.502612	0.1	0.0555556	4	1	4	1	290_T2, 185_T1, 383_T1, 366_T2	452_T2
HOXA11	GAIN.up	1.87055	0.502612	0.1	0.0555556	4	1	4	1	290_T2, 185_T1, 383_T1, 366_T2	452_T2
HOXA13	GAIN.up	1.87055	0.502612	0.1	0.0555556	4	1	4	1	290_T2, 185_T1, 383_T1, 366_T2	452_T2
HOXA9	GAIN.up	1.87055	0.502612	0.1	0.0555556	4	1	4	1	290_T2, 185_T1, 383_T1, 366_T2	452_T2
GNA13	AMP.up	1.87055	0.502612	0.1	0.0555556	4	1	4	1	398_T1, 191_T1, 401_T1, 177_Prospective1	567_T1
FCGR2B	AMP.up	1.87055	0.502612	0.1	0.0555556	4	1	4	1	290_T2, 397_T1, 394_T2, 350_T1	452_T2
HIP1	GAIN.up	1.821	0.513795	0.1	0.0555556	4	1	4	1	366_T2, 357_T1, 408_T1B, 538_T1	372_T1
LPP	GAIN.up	1.821	0.513795	0.1	0.0555556	4	1	4	1	191_T1, 346_T1, 331_T1, 408_T1B	358_T1
ATM	HOMDEL	1.40381	0.521579	0.15	0.111111	6	2	6	2	295_T1, 350_T1, 333_T1, 185_T1, 177_Prospective1, 299_T1	376_T2, 614_T1
CD79B	ACT	1.40381	0.521579	0.15	0.111111	6	2	6	2	191_T1, 473_T1, 430_T1, 398_T1, 401_T1, 177_Prospective1	327_T1, 567_T1
DDX5	ACT	1.40381	0.521579	0.15	0.111111	6	2	6	2	473_T1, 191_T1, 430_T1, 398_T1, 401_T1, 177_Prospective1	327_T1, 567_T1
DDX5	ACT.inc	1.40381	0.521579	0.15	0.111111	6	2	6	2	473_T1, 191_T1, 430_T1, 398_T1, 401_T1, 177_Prospective1	327_T1, 567_T1
CD79B	AMP.up	1.40381	0.521579	0.15	0.111111	6	2	6	2	191_T1, 473_T1, 430_T1, 398_T1, 401_T1, 177_Prospective1	327_T1, 567_T1
DDX5	AMP.up	1.40381	0.521579	0.15	0.111111	6	2	6	2	473_T1, 191_T1, 430_T1, 398_T1, 401_T1, 177_Prospective1	327_T1, 567_T1
HEY1	GAIN.up	1.11219	0.561893	0.3	0.277778	12	5	12	5	307_T1, 346_T1, 195_T1, 386_T1, 333_T1, 473_T1, 385_T1, 191_T1, 329_T1, 381_T1, 294_T2, 299_T1	376_T2, 452_T2, 387_T1, 361_T1, 614_T1
RECQL4	GAIN.up	1.11219	0.561893	0.3	0.277778	12	5	12	5	307_T1, 195_T1, 346_T1, 386_T1, 473_T1, 329_T1, 385_T1, 381_T1, 383_T1, 333_T1, 397_T1, 299_T1	387_T1, 452_T2, 358_T1, 361_T1, 614_T1
ELK4	ACT	1.1403	0.626624	0.125	0.111111	5	2	5	2	333_T1, 397_T1, 330_T1, 331_T1, 191_T1	452_T2, 376_T2
GNAS	ACT.inc	1.1403	0.626624	0.125	0.111111	5	2	5	2	366_T2, 401_T1, 473_T1, 394_T2, 303_T1	532_T1, 372_T1
ELK4	ACT.inc	1.1403	0.626624	0.125	0.111111	5	2	5	2	333_T1, 397_T1, 330_T1, 331_T1, 191_T1	452_T2, 376_T2
MAPK3	GAIN.up	1.1403	0.626624	0.125	0.111111	5	2	5	2	195_T1, 350_T1, 401_T1, 346_T1, 294_T2	306_T1, 515_T1
SETD1A	GAIN.up	1.1403	0.626624	0.125	0.111111	5	2	5	2	195_T1, 350_T1, 346_T1, 383_T1, 294_T2	515_T1, 306_T1
ELK4	AMP.up	1.1403	0.626624	0.125	0.111111	5	2	5	2	333_T1, 397_T1, 330_T1, 331_T1, 191_T1	452_T2, 376_T2
MSI2	GAIN.up	1.05954	0.627625	0.175	0.166667	7	3	7	3	401_T1, 330_T1, 473_T1, 195_T1, 303_T1, 496_T1, 177_Prospective1	361_T1, 327_T1, 567_T1
SIRPA	HOMDEL	1.37121	0.634572	0.075	0.0555556	3	1	3	1	303_T1, 538_T1, 568_T1	509_T1
ERBB2	ACT	1.37121	0.634572	0.075	0.0555556	3	1	3	1	315_T1, 397_T1, 391_T1	387_T1
GNAS	ACT	1.37121	0.634572	0.075	0.0555556	3	1	3	1	473_T1, 394_T2, 303_T1	372_T1
MCL1	ACT	1.37121	0.634572	0.075	0.0555556	3	1	3	1	386_T1, 397_T1, 350_T1	452_T2
MDM2	ACT	1.37121	0.634572	0.075	0.0555556	3	1	3	1	430_T1, 329_T1, 473_T1	327_T1
RPS6KB2	ACT	1.37121	0.634572	0.075	0.0555556	3	1	3	1	459_Archival1, 290_T2, 496_T1	434_T1
SETDB1	ACT	1.37121	0.634572	0.075	0.0555556	3	1	3	1	386_T1, 397_T1, 350_T1	452_T2
ARNT	ACT	1.37121	0.634572	0.075	0.0555556	3	1	3	1	386_T1, 397_T1, 350_T1	452_T2
H3F3B	ACT	1.37121	0.634572	0.075	0.0555556	3	1	3	1	338_T1, 307_T1, 177_Prospective1	567_T1
KAT6A	ACT	1.37121	0.634572	0.075	0.0555556	3	1	3	1	195_T1, 333_T1, 307_T1	567_T1
TNFRSF17	ACT	1.37121	0.634572	0.075	0.0555556	3	1	3	1	330_T1, 195_T1, 350_T1	361_T1
GRB2	ACT	1.37121	0.634572	0.075	0.0555556	3	1	3	1	338_T1, 307_T1, 177_Prospective1	567_T1
ABL2	ACT.inc	1.37121	0.634572	0.075	0.0555556	3	1	3	1	331_T1, 397_T1, 386_T1	452_T2
MCL1	ACT.inc	1.37121	0.634572	0.075	0.0555556	3	1	3	1	386_T1, 397_T1, 350_T1	452_T2
MDM2	ACT.inc	1.37121	0.634572	0.075	0.0555556	3	1	3	1	430_T1, 329_T1, 473_T1	327_T1
MGAM	ACT.inc	1.37121	0.634572	0.075	0.0555556	3	1	3	1	292_T1, 366_T2, 290_T2	532_T1
MLLT10	ACT.inc	1.37121	0.634572	0.075	0.0555556	3	1	3	1	331_T1, 606_T1, 299_T1	509_T1
NCSTN	ACT.inc	1.37121	0.634572	0.075	0.0555556	3	1	3	1	366_T2, 397_T1, 350_T1	452_T2
RPS6KB2	ACT.inc	1.37121	0.634572	0.075	0.0555556	3	1	3	1	459_Archival1, 290_T2, 496_T1	434_T1
ARNT	ACT.inc	1.37121	0.634572	0.075	0.0555556	3	1	3	1	386_T1, 397_T1, 350_T1	452_T2
CTNND2	ACT.inc	1.37121	0.634572	0.075	0.0555556	3	1	3	1	383_T1, 459_Archival1, 307_T1	532_T1
H3F3B	ACT.inc	1.37121	0.634572	0.075	0.0555556	3	1	3	1	338_T1, 307_T1, 177_Prospective1	567_T1
HNRNPA2B1	ACT.inc	1.37121	0.634572	0.075	0.0555556	3	1	3	1	350_T1, 568_T1, 290_T2	452_T2
TNFRSF17	ACT.inc	1.37121	0.634572	0.075	0.0555556	3	1	3	1	330_T1, 195_T1, 350_T1	361_T1
TEAD2	ACT.inc	1.37121	0.634572	0.075	0.0555556	3	1	3	1	307_T1, 386_T1, 177_Prospective1	515_T1
GRB2	ACT.inc	1.37121	0.634572	0.075	0.0555556	3	1	3	1	338_T1, 307_T1, 177_Prospective1	567_T1
BCL6	GAIN.up	1.37121	0.634572	0.075	0.0555556	3	1	3	1	191_T1, 346_T1, 331_T1	358_T1
HOXB13	GAIN.up	1.37121	0.634572	0.075	0.0555556	3	1	3	1	191_T1, 195_T1, 496_T1	358_T1
RPS6KB2	GAIN.up	1.37121	0.634572	0.075	0.0555556	3	1	3	1	459_Archival1, 290_T2, 496_T1	434_T1
SOX2	GAIN.up	1.37121	0.634572	0.075	0.0555556	3	1	3	1	191_T1, 346_T1, 331_T1	358_T1
MLXIPL	GAIN.up	1.37121	0.634572	0.075	0.0555556	3	1	3	1	290_T2, 357_T1, 366_T2	372_T1
LRP5	GAIN.up	1.37121	0.634572	0.075	0.0555556	3	1	3	1	307_T1, 315_T1, 459_Archival1	376_T2
FZD9	GAIN.up	1.37121	0.634572	0.075	0.0555556	3	1	3	1	290_T2, 357_T1, 366_T2	372_T1
PPP2R1A	GAIN.up	1.37121	0.634572	0.075	0.0555556	3	1	3	1	386_T1, 315_T1, 177_Prospective1	372_T1
GNAS	AMP.up	1.37121	0.634572	0.075	0.0555556	3	1	3	1	473_T1, 394_T2, 303_T1	372_T1
MCL1	AMP.up	1.37121	0.634572	0.075	0.0555556	3	1	3	1	386_T1, 397_T1, 350_T1	452_T2
MDM2	AMP.up	1.37121	0.634572	0.075	0.0555556	3	1	3	1	430_T1, 329_T1, 473_T1	327_T1
RPS6KB2	AMP.up	1.37121	0.634572	0.075	0.0555556	3	1	3	1	459_Archival1, 290_T2, 496_T1	434_T1
SETDB1	AMP.up	1.37121	0.634572	0.075	0.0555556	3	1	3	1	386_T1, 397_T1, 350_T1	452_T2
ARNT	AMP.up	1.37121	0.634572	0.075	0.0555556	3	1	3	1	386_T1, 397_T1, 350_T1	452_T2
H3F3B	AMP.up	1.37121	0.634572	0.075	0.0555556	3	1	3	1	338_T1, 307_T1, 177_Prospective1	567_T1
KAT6A	AMP.up	1.37121	0.634572	0.075	0.0555556	3	1	3	1	195_T1, 333_T1, 307_T1	567_T1
TNFRSF17	AMP.up	1.37121	0.634572	0.075	0.0555556	3	1	3	1	330_T1, 195_T1, 350_T1	361_T1
GRB2	AMP.up	1.37121	0.634572	0.075	0.0555556	3	1	3	1	338_T1, 307_T1, 177_Prospective1	567_T1
LGR5	AMP.up	1.37121	0.634572	0.075	0.0555556	3	1	3	1	430_T1, 329_T1, 303_T1	327_T1
CARD11	GAIN.up	1.33581	0.644107	0.075	0.0555556	3	1	3	1	303_T1, 383_T1, 408_T1B	452_T2
GNA12	GAIN.up	1.33581	0.644107	0.075	0.0555556	3	1	3	1	303_T1, 383_T1, 408_T1B	452_T2
TP63	GAIN.up	1.33581	0.644107	0.075	0.0555556	3	1	3	1	191_T1, 346_T1, 408_T1B	358_T1
MYC	GAIN.up	0.96362	0.646406	0.325	0.333333	13	6	13	6	307_T1, 195_T1, 191_T1, 385_T1, 386_T1, 346_T1, 473_T1, 329_T1, 383_T1, 333_T1, 401_T1, 381_T1, 299_T1	376_T2, 452_T2, 387_T1, 372_T1, 358_T1, 614_T1
PIK3CA	ACT	0.925178	0.665728	0.425	0.444444	17	8	17	8	195_T1, 290_T2, 292_T1, 294_T2, 295_T1, 315_T1, 331_T1, 338_T1, 346_T1, 349_T1, 350_T1, 366_T2, 381_T1, 394_T2, 398_T1, 401_T1, 459_Archival1	260_T1, 314_T1, 358_T1, 361_T1, 387_T1, 452_T2, 515_T1, 614_T1
PIK3CA	ACT.inc	0.925178	0.665728	0.425	0.444444	17	8	17	8	195_T1, 290_T2, 292_T1, 294_T2, 295_T1, 315_T1, 331_T1, 338_T1, 346_T1, 349_T1, 350_T1, 366_T2, 381_T1, 394_T2, 398_T1, 401_T1, 459_Archival1	260_T1, 314_T1, 358_T1, 361_T1, 387_T1, 452_T2, 515_T1, 614_T1
APC	HOMDEL	Inf	0.689655	0.025	0	1	0	1	0	459_Archival1
ARID1A	HOMDEL	Inf	0.689655	0.025	0	1	0	1	0	401_T1
ARID4B	HOMDEL	Inf	0.689655	0.025	0	1	0	1	0	568_T1
AXIN2	HOMDEL	Inf	0.689655	0.025	0	1	0	1	0	185_T1
BLM	HOMDEL	Inf	0.689655	0.025	0	1	0	1	0	338_T1
CDC73	HOMDEL	Inf	0.689655	0.025	0	1	0	1	0	568_T1
CDK12	HOMDEL	Inf	0.689655	0.025	0	1	0	1	0	366_T2
CDKN1B	HOMDEL	Inf	0.689655	0.025	0	1	0	1	0	195_T1
CIC	HOMDEL	Inf	0.689655	0.025	0	1	0	1	0	366_T2
CIITA	HOMDEL	Inf	0.689655	0.025	0	1	0	1	0	366_T2
CREBBP	HOMDEL	Inf	0.689655	0.025	0	1	0	1	0	386_T1
DNMT3A	HOMDEL	Inf	0.689655	0.025	0	1	0	1	0	401_T1
EZH2	HOMDEL	Inf	0.689655	0.025	0	1	0	1	0	366_T2
GATA3	HOMDEL	Inf	0.689655	0.025	0	1	0	1	0	473_T1
GPS2	HOMDEL	Inf	0.689655	0.025	0	1	0	1	0	338_T1
GRIN2A	HOMDEL	Inf	0.689655	0.025	0	1	0	1	0	386_T1
HNF1A	HOMDEL	Inf	0.689655	0.025	0	1	0	1	0	366_T2
INPPL1	HOMDEL	Inf	0.689655	0.025	0	1	0	1	0	299_T1
JAK1	HOMDEL	Inf	0.689655	0.025	0	1	0	1	0	386_T1
KMT2B	HOMDEL	Inf	0.689655	0.025	0	1	0	1	0	366_T2
LATS1	HOMDEL	Inf	0.689655	0.025	0	1	0	1	0	299_T1
NF2	HOMDEL	Inf	0.689655	0.025	0	1	0	1	0	538_T1
NOTCH1	HOMDEL	Inf	0.689655	0.025	0	1	0	1	0	331_T1
PRDM1	HOMDEL	Inf	0.689655	0.025	0	1	0	1	0	366_T2
PTPRD	HOMDEL	Inf	0.689655	0.025	0	1	0	1	0	386_T1
RECQL4	HOMDEL	Inf	0.689655	0.025	0	1	0	1	0	331_T1
ROBO1	HOMDEL	Inf	0.689655	0.025	0	1	0	1	0	292_T1
SH2B3	HOMDEL	Inf	0.689655	0.025	0	1	0	1	0	366_T2
SMAD2	HOMDEL	Inf	0.689655	0.025	0	1	0	1	0	366_T2
TBX3	HOMDEL	Inf	0.689655	0.025	0	1	0	1	0	459_Archival1
TNFAIP3	HOMDEL	Inf	0.689655	0.025	0	1	0	1	0	366_T2
TP53BP1	HOMDEL	Inf	0.689655	0.025	0	1	0	1	0	292_T1
TP63	HOMDEL	Inf	0.689655	0.025	0	1	0	1	0	331_T1
ATP1A1	HOMDEL	Inf	0.689655	0.025	0	1	0	1	0	292_T1
CNTNAP2	HOMDEL	Inf	0.689655	0.025	0	1	0	1	0	366_T2
CPEB3	HOMDEL	Inf	0.689655	0.025	0	1	0	1	0	185_T1
CSMD3	HOMDEL	Inf	0.689655	0.025	0	1	0	1	0	366_T2
DNM2	HOMDEL	Inf	0.689655	0.025	0	1	0	1	0	538_T1
EPS15	HOMDEL	Inf	0.689655	0.025	0	1	0	1	0	386_T1
ETNK1	HOMDEL	Inf	0.689655	0.025	0	1	0	1	0	191_T1
IGF2BP2	HOMDEL	Inf	0.689655	0.025	0	1	0	1	0	331_T1
IKZF1	HOMDEL	Inf	0.689655	0.025	0	1	0	1	0	366_T2
MALAT1	HOMDEL	Inf	0.689655	0.025	0	1	0	1	0	366_T2
POLQ	HOMDEL	Inf	0.689655	0.025	0	1	0	1	0	366_T2
PPARG	HOMDEL	Inf	0.689655	0.025	0	1	0	1	0	385_T1
RANBP2	HOMDEL	Inf	0.689655	0.025	0	1	0	1	0	386_T1
STAT5B	HOMDEL	Inf	0.689655	0.025	0	1	0	1	0	366_T2
TRIM33	HOMDEL	Inf	0.689655	0.025	0	1	0	1	0	366_T2
UBR5	HOMDEL	Inf	0.689655	0.025	0	1	0	1	0	538_T1
WNK2	HOMDEL	Inf	0.689655	0.025	0	1	0	1	0	295_T1
WRN	HOMDEL	Inf	0.689655	0.025	0	1	0	1	0	606_T1
STK3	HOMDEL	Inf	0.689655	0.025	0	1	0	1	0	366_T2
HMCN1	HOMDEL	Inf	0.689655	0.025	0	1	0	1	0	366_T2
FAT2	HOMDEL	Inf	0.689655	0.025	0	1	0	1	0	366_T2
FAT3	HOMDEL	Inf	0.689655	0.025	0	1	0	1	0	459_Archival1
TLE1	HOMDEL	Inf	0.689655	0.025	0	1	0	1	0	295_T1
TLE2	HOMDEL	Inf	0.689655	0.025	0	1	0	1	0	535_T1
TLE3	HOMDEL	Inf	0.689655	0.025	0	1	0	1	0	394_T2
AURKA	ACT	Inf	0.689655	0.025	0	1	0	1	0	303_T1
BRAF	ACT	Inf	0.689655	0.025	0	1	0	1	0	538_T1
CTNNB1	ACT	Inf	0.689655	0.025	0	1	0	1	0	295_T1
FOXA1	ACT	Inf	0.689655	0.025	0	1	0	1	0	381_T1
GATA3	ACT	Inf	0.689655	0.025	0	1	0	1	0	299_T1
HRAS	ACT	Inf	0.689655	0.025	0	1	0	1	0	398_T1
IDH2	ACT	Inf	0.689655	0.025	0	1	0	1	0	338_T1
IL7R	ACT	Inf	0.689655	0.025	0	1	0	1	0	307_T1
MGAM	ACT	Inf	0.689655	0.025	0	1	0	1	0	290_T2
MITF	ACT	Inf	0.689655	0.025	0	2	0	1	0	408_T1B, 408_T1A
MLLT10	ACT	Inf	0.689655	0.025	0	1	0	1	0	299_T1
MSI1	ACT	Inf	0.689655	0.025	0	1	0	1	0	307_T1
NOTCH2	ACT	Inf	0.689655	0.025	0	1	0	1	0	350_T1
NRAS	ACT	Inf	0.689655	0.025	0	1	0	1	0	290_T2
NTRK3	ACT	Inf	0.689655	0.025	0	1	0	1	0	338_T1
PTPN1	ACT	Inf	0.689655	0.025	0	1	0	1	0	394_T2
RAB35	ACT	Inf	0.689655	0.025	0	1	0	1	0	307_T1
RAC2	ACT	Inf	0.689655	0.025	0	1	0	1	0	307_T1
RICTOR	ACT	Inf	0.689655	0.025	0	1	0	1	0	307_T1
RRAS	ACT	Inf	0.689655	0.025	0	1	0	1	0	177_Prospective1
VEGFA	ACT	Inf	0.689655	0.025	0	1	0	1	0	383_T1
BCL11B	ACT	Inf	0.689655	0.025	0	1	0	1	0	430_T1
BMPR1A	ACT	Inf	0.689655	0.025	0	1	0	1	0	398_T1
CCR4	ACT	Inf	0.689655	0.025	0	1	0	1	0	473_T1
CTNND2	ACT	Inf	0.689655	0.025	0	1	0	1	0	307_T1
HMGA2	ACT	Inf	0.689655	0.025	0	1	0	1	0	473_T1
MUC4	ACT	Inf	0.689655	0.025	0	1	0	1	0	290_T2
MYCL	ACT	Inf	0.689655	0.025	0	1	0	1	0	394_T2
NFATC2	ACT	Inf	0.689655	0.025	0	1	0	1	0	473_T1
SH3GL1	ACT	Inf	0.689655	0.025	0	1	0	1	0	568_T1
SUZ12	ACT	Inf	0.689655	0.025	0	1	0	1	0	346_T1
TET1	ACT	Inf	0.689655	0.025	0	1	0	1	0	307_T1
ZEB1	ACT	Inf	0.689655	0.025	0	1	0	1	0	299_T1
ZNF521	ACT	Inf	0.689655	0.025	0	1	0	1	0	307_T1
HIPK2	ACT	Inf	0.689655	0.025	0	1	0	1	0	385_T1
MLXIP	ACT	Inf	0.689655	0.025	0	1	0	1	0	307_T1
FZD10	ACT	Inf	0.689655	0.025	0	1	0	1	0	307_T1
FZD4	ACT	Inf	0.689655	0.025	0	1	0	1	0	307_T1
FZD8	ACT	Inf	0.689655	0.025	0	1	0	1	0	299_T1
WNT7A	ACT	Inf	0.689655	0.025	0	2	0	1	0	408_T1B, 408_T1A
PPP2R1A	ACT	Inf	0.689655	0.025	0	1	0	1	0	177_Prospective1
ARHGEF28	ACT.inc	Inf	0.689655	0.025	0	1	0	1	0	394_T2
AURKA	ACT.inc	Inf	0.689655	0.025	0	1	0	1	0	303_T1
AURKB	ACT.inc	Inf	0.689655	0.025	0	1	0	1	0	366_T2
BRD4	ACT.inc	Inf	0.689655	0.025	0	1	0	1	0	349_T1
CTNNB1	ACT.inc	Inf	0.689655	0.025	0	1	0	1	0	295_T1
CXCR4	ACT.inc	Inf	0.689655	0.025	0	1	0	1	0	366_T2
ETV6	ACT.inc	Inf	0.689655	0.025	0	1	0	1	0	295_T1
EZH1	ACT.inc	Inf	0.689655	0.025	0	1	0	1	0	292_T1
EZH2	ACT.inc	Inf	0.689655	0.025	0	1	0	1	0	366_T2
FGFR4	ACT.inc	Inf	0.689655	0.025	0	1	0	1	0	383_T1
FLT1	ACT.inc	Inf	0.689655	0.025	0	1	0	1	0	329_T1
FLT3	ACT.inc	Inf	0.689655	0.025	0	1	0	1	0	386_T1
FLT4	ACT.inc	Inf	0.689655	0.025	0	1	0	1	0	366_T2
FOXP1	ACT.inc	Inf	0.689655	0.025	0	1	0	1	0	398_T1
GATA3	ACT.inc	Inf	0.689655	0.025	0	1	0	1	0	299_T1
HDAC1	ACT.inc	Inf	0.689655	0.025	0	1	0	1	0	366_T2
HRAS	ACT.inc	Inf	0.689655	0.025	0	1	0	1	0	398_T1
IDH2	ACT.inc	Inf	0.689655	0.025	0	1	0	1	0	338_T1
IL7R	ACT.inc	Inf	0.689655	0.025	0	1	0	1	0	307_T1
IRS1	ACT.inc	Inf	0.689655	0.025	0	1	0	1	0	606_T1
KIT	ACT.inc	Inf	0.689655	0.025	0	1	0	1	0	568_T1
KLF4	ACT.inc	Inf	0.689655	0.025	0	1	0	1	0	366_T2
KMT2B	ACT.inc	Inf	0.689655	0.025	0	1	0	1	0	366_T2
MAP3K13	ACT.inc	Inf	0.689655	0.025	0	1	0	1	0	366_T2
MITF	ACT.inc	Inf	0.689655	0.025	0	2	0	1	0	408_T1B, 408_T1A
MSI1	ACT.inc	Inf	0.689655	0.025	0	1	0	1	0	307_T1
MTOR	ACT.inc	Inf	0.689655	0.025	0	1	0	1	0	366_T2
NOTCH4	ACT.inc	Inf	0.689655	0.025	0	1	0	1	0	430_T1
NRAS	ACT.inc	Inf	0.689655	0.025	0	1	0	1	0	290_T2
NTRK2	ACT.inc	Inf	0.689655	0.025	0	1	0	1	0	191_T1
PDCD1	ACT.inc	Inf	0.689655	0.025	0	1	0	1	0	459_Archival1
PDGFRB	ACT.inc	Inf	0.689655	0.025	0	1	0	1	0	430_T1
PIK3CB	ACT.inc	Inf	0.689655	0.025	0	1	0	1	0	459_Archival1
PPARG	ACT.inc	Inf	0.689655	0.025	0	1	0	1	0	385_T1
PRKCI	ACT.inc	Inf	0.689655	0.025	0	1	0	1	0	366_T2
PTPN1	ACT.inc	Inf	0.689655	0.025	0	1	0	1	0	394_T2
PTPN11	ACT.inc	Inf	0.689655	0.025	0	1	0	1	0	366_T2
RAC2	ACT.inc	Inf	0.689655	0.025	0	1	0	1	0	307_T1
RICTOR	ACT.inc	Inf	0.689655	0.025	0	1	0	1	0	307_T1
RRAS	ACT.inc	Inf	0.689655	0.025	0	1	0	1	0	177_Prospective1
SF3B1	ACT.inc	Inf	0.689655	0.025	0	1	0	1	0	366_T2
SOS1	ACT.inc	Inf	0.689655	0.025	0	1	0	1	0	338_T1
SOX2	ACT.inc	Inf	0.689655	0.025	0	1	0	1	0	333_T1
STAT5A	ACT.inc	Inf	0.689655	0.025	0	1	0	1	0	366_T2
STAT6	ACT.inc	Inf	0.689655	0.025	0	1	0	1	0	295_T1
TP63	ACT.inc	Inf	0.689655	0.025	0	1	0	1	0	331_T1
VEGFA	ACT.inc	Inf	0.689655	0.025	0	1	0	1	0	383_T1
XPO1	ACT.inc	Inf	0.689655	0.025	0	1	0	1	0	349_T1
A1CF	ACT.inc	Inf	0.689655	0.025	0	1	0	1	0	366_T2
AFF3	ACT.inc	Inf	0.689655	0.025	0	1	0	1	0	366_T2
BIRC3	ACT.inc	Inf	0.689655	0.025	0	1	0	1	0	366_T2
BMPR1A	ACT.inc	Inf	0.689655	0.025	0	1	0	1	0	398_T1
CBL	ACT.inc	Inf	0.689655	0.025	0	1	0	1	0	366_T2
CCR4	ACT.inc	Inf	0.689655	0.025	0	1	0	1	0	473_T1
CUX1	ACT.inc	Inf	0.689655	0.025	0	1	0	1	0	331_T1
DAXX	ACT.inc	Inf	0.689655	0.025	0	1	0	1	0	366_T2
ETV5	ACT.inc	Inf	0.689655	0.025	0	1	0	1	0	401_T1
FLI1	ACT.inc	Inf	0.689655	0.025	0	1	0	1	0	330_T1
FOXO3	ACT.inc	Inf	0.689655	0.025	0	1	0	1	0	366_T2
HMGA2	ACT.inc	Inf	0.689655	0.025	0	1	0	1	0	473_T1
MAP3K1	ACT.inc	Inf	0.689655	0.025	0	1	0	1	0	366_T2
MYB	ACT.inc	Inf	0.689655	0.025	0	1	0	1	0	366_T2
MYCL	ACT.inc	Inf	0.689655	0.025	0	1	0	1	0	394_T2
NFATC2	ACT.inc	Inf	0.689655	0.025	0	1	0	1	0	473_T1
PAX3	ACT.inc	Inf	0.689655	0.025	0	1	0	1	0	331_T1
PAX5	ACT.inc	Inf	0.689655	0.025	0	1	0	1	0	366_T2
POU5F1	ACT.inc	Inf	0.689655	0.025	0	1	0	1	0	397_T1
PSIP1	ACT.inc	Inf	0.689655	0.025	0	1	0	1	0	185_T1
RAP1GDS1	ACT.inc	Inf	0.689655	0.025	0	1	0	1	0	191_T1
RARA	ACT.inc	Inf	0.689655	0.025	0	1	0	1	0	299_T1
SH3GL1	ACT.inc	Inf	0.689655	0.025	0	1	0	1	0	568_T1
SUZ12	ACT.inc	Inf	0.689655	0.025	0	1	0	1	0	346_T1
TET1	ACT.inc	Inf	0.689655	0.025	0	1	0	1	0	307_T1
USP8	ACT.inc	Inf	0.689655	0.025	0	1	0	1	0	366_T2
TEAD4	ACT.inc	Inf	0.689655	0.025	0	1	0	1	0	383_T1
HIPK2	ACT.inc	Inf	0.689655	0.025	0	1	0	1	0	385_T1
AJUBA	ACT.inc	Inf	0.689655	0.025	0	1	0	1	0	366_T2
DVL2	ACT.inc	Inf	0.689655	0.025	0	1	0	1	0	191_T1
FZD4	ACT.inc	Inf	0.689655	0.025	0	1	0	1	0	307_T1
FZD8	ACT.inc	Inf	0.689655	0.025	0	1	0	1	0	299_T1
WNT1	ACT.inc	Inf	0.689655	0.025	0	1	0	1	0	366_T2
WNT7A	ACT.inc	Inf	0.689655	0.025	0	2	0	1	0	408_T1B, 408_T1A
WNT8A	ACT.inc	Inf	0.689655	0.025	0	1	0	1	0	329_T1
DNMT3A	ACT.inc	Inf	0.689655	0.025	0	1	0	1	0	459_Archival1
PPP2R1A	ACT.inc	Inf	0.689655	0.025	0	1	0	1	0	177_Prospective1
ALK	GAIN.up	Inf	0.689655	0.025	0	1	0	1	0	473_T1
BCL2	GAIN.up	Inf	0.689655	0.025	0	1	0	1	0	185_T1
CCND2	GAIN.up	Inf	0.689655	0.025	0	1	0	1	0	177_Prospective1
CD274	GAIN.up	Inf	0.689655	0.025	0	1	0	1	0	397_T1
CD28	GAIN.up	Inf	0.689655	0.025	0	1	0	1	0	385_T1
CDK6	GAIN.up	Inf	0.689655	0.025	0	1	0	1	0	366_T2
CDK8	GAIN.up	Inf	0.689655	0.025	0	1	0	1	0	401_T1
CTLA4	GAIN.up	Inf	0.689655	0.025	0	1	0	1	0	385_T1
CTNNB1	GAIN.up	Inf	0.689655	0.025	0	1	0	1	0	473_T1
EPHA7	GAIN.up	Inf	0.689655	0.025	0	1	0	1	0	397_T1
ERBB4	GAIN.up	Inf	0.689655	0.025	0	1	0	1	0	385_T1
ETV4	GAIN.up	Inf	0.689655	0.025	0	1	0	1	0	496_T1
EZH1	GAIN.up	Inf	0.689655	0.025	0	1	0	1	0	496_T1
FLT1	GAIN.up	Inf	0.689655	0.025	0	1	0	1	0	401_T1
FLT3	GAIN.up	Inf	0.689655	0.025	0	1	0	1	0	401_T1
FURIN	GAIN.up	Inf	0.689655	0.025	0	1	0	1	0	349_T1
GATA2	GAIN.up	Inf	0.689655	0.025	0	1	0	1	0	331_T1
GATA3	GAIN.up	Inf	0.689655	0.025	0	1	0	1	0	299_T1
GLI1	GAIN.up	Inf	0.689655	0.025	0	1	0	1	0	397_T1
HDAC7	GAIN.up	Inf	0.689655	0.025	0	1	0	1	0	397_T1
HGF	GAIN.up	Inf	0.689655	0.025	0	1	0	1	0	366_T2
IDH1	GAIN.up	Inf	0.689655	0.025	0	1	0	1	0	385_T1
IRS2	GAIN.up	Inf	0.689655	0.025	0	1	0	1	0	177_Prospective1
JAK2	GAIN.up	Inf	0.689655	0.025	0	1	0	1	0	397_T1
KDM5A	GAIN.up	Inf	0.689655	0.025	0	1	0	1	0	177_Prospective1
KLF4	GAIN.up	Inf	0.689655	0.025	0	1	0	1	0	185_T1
MAPK1	GAIN.up	Inf	0.689655	0.025	0	1	0	1	0	346_T1
MGAM	GAIN.up	Inf	0.689655	0.025	0	1	0	1	0	290_T2
MITF	GAIN.up	Inf	0.689655	0.025	0	2	0	1	0	408_T1B, 408_T1A
MPL	GAIN.up	Inf	0.689655	0.025	0	1	0	1	0	366_T2
MYCN	GAIN.up	Inf	0.689655	0.025	0	1	0	1	0	473_T1
MYD88	GAIN.up	Inf	0.689655	0.025	0	1	0	1	0	473_T1
NFE2	GAIN.up	Inf	0.689655	0.025	0	1	0	1	0	397_T1
NOTCH1	GAIN.up	Inf	0.689655	0.025	0	1	0	1	0	295_T1
NOTCH4	GAIN.up	Inf	0.689655	0.025	0	1	0	1	0	401_T1
PDCD1LG2	GAIN.up	Inf	0.689655	0.025	0	1	0	1	0	397_T1
PPARG	GAIN.up	Inf	0.689655	0.025	0	1	0	1	0	473_T1
PTPN11	GAIN.up	Inf	0.689655	0.025	0	1	0	1	0	177_Prospective1
RAC2	GAIN.up	Inf	0.689655	0.025	0	1	0	1	0	307_T1
RAF1	GAIN.up	Inf	0.689655	0.025	0	1	0	1	0	473_T1
REL	GAIN.up	Inf	0.689655	0.025	0	1	0	1	0	473_T1
RET	GAIN.up	Inf	0.689655	0.025	0	1	0	1	0	177_Prospective1
RRAGC	GAIN.up	Inf	0.689655	0.025	0	1	0	1	0	394_T2
RRAS2	GAIN.up	Inf	0.689655	0.025	0	1	0	1	0	535_T1
SOS1	GAIN.up	Inf	0.689655	0.025	0	1	0	1	0	473_T1
STAT3	GAIN.up	Inf	0.689655	0.025	0	1	0	1	0	496_T1
STAT5A	GAIN.up	Inf	0.689655	0.025	0	1	0	1	0	496_T1
STAT5B	GAIN.up	Inf	0.689655	0.025	0	1	0	1	0	496_T1
STAT6	GAIN.up	Inf	0.689655	0.025	0	1	0	1	0	397_T1
TSHR	GAIN.up	Inf	0.689655	0.025	0	1	0	1	0	331_T1
U2AF1	GAIN.up	Inf	0.689655	0.025	0	1	0	1	0	331_T1
XPO1	GAIN.up	Inf	0.689655	0.025	0	1	0	1	0	473_T1
AFF4	GAIN.up	Inf	0.689655	0.025	0	1	0	1	0	386_T1
BCL11A	GAIN.up	Inf	0.689655	0.025	0	1	0	1	0	473_T1
BIRC6	GAIN.up	Inf	0.689655	0.025	0	1	0	1	0	473_T1
BMPR1A	GAIN.up	Inf	0.689655	0.025	0	1	0	1	0	398_T1
CIC	GAIN.up	Inf	0.689655	0.025	0	1	0	1	0	177_Prospective1
CREB1	GAIN.up	Inf	0.689655	0.025	0	1	0	1	0	385_T1
DDB2	GAIN.up	Inf	0.689655	0.025	0	2	0	1	0	408_T1B, 408_T1A
DDIT3	GAIN.up	Inf	0.689655	0.025	0	1	0	1	0	397_T1
FES	GAIN.up	Inf	0.689655	0.025	0	1	0	1	0	349_T1
FEV	GAIN.up	Inf	0.689655	0.025	0	1	0	1	0	385_T1
GRM3	GAIN.up	Inf	0.689655	0.025	0	1	0	1	0	366_T2
HOXC11	GAIN.up	Inf	0.689655	0.025	0	1	0	1	0	397_T1
HOXC13	GAIN.up	Inf	0.689655	0.025	0	1	0	1	0	397_T1
KMT2D	GAIN.up	Inf	0.689655	0.025	0	1	0	1	0	397_T1
LEF1	GAIN.up	Inf	0.689655	0.025	0	1	0	1	0	195_T1
MALT1	GAIN.up	Inf	0.689655	0.025	0	1	0	1	0	185_T1
MLLT4	GAIN.up	Inf	0.689655	0.025	0	1	0	1	0	397_T1
MYCL	GAIN.up	Inf	0.689655	0.025	0	1	0	1	0	394_T2
NUTM1	GAIN.up	Inf	0.689655	0.025	0	1	0	1	0	430_T1
PAX3	GAIN.up	Inf	0.689655	0.025	0	1	0	1	0	385_T1
PAX5	GAIN.up	Inf	0.689655	0.025	0	1	0	1	0	397_T1
PSIP1	GAIN.up	Inf	0.689655	0.025	0	1	0	1	0	397_T1
QKI	GAIN.up	Inf	0.689655	0.025	0	1	0	1	0	397_T1
RAP1GDS1	GAIN.up	Inf	0.689655	0.025	0	1	0	1	0	195_T1
SETBP1	GAIN.up	Inf	0.689655	0.025	0	1	0	1	0	307_T1
TAL2	GAIN.up	Inf	0.689655	0.025	0	1	0	1	0	185_T1
TCL1A	GAIN.up	Inf	0.689655	0.025	0	1	0	1	0	349_T1
TET1	GAIN.up	Inf	0.689655	0.025	0	1	0	1	0	307_T1
TNC	GAIN.up	Inf	0.689655	0.025	0	1	0	1	0	185_T1
ZEB1	GAIN.up	Inf	0.689655	0.025	0	1	0	1	0	299_T1
TEAD1	GAIN.up	Inf	0.689655	0.025	0	1	0	1	0	535_T1
TEAD4	GAIN.up	Inf	0.689655	0.025	0	1	0	1	0	177_Prospective1
HIPK2	GAIN.up	Inf	0.689655	0.025	0	1	0	1	0	385_T1
RPS6	GAIN.up	Inf	0.689655	0.025	0	1	0	1	0	397_T1
FZD1	GAIN.up	Inf	0.689655	0.025	0	1	0	1	0	366_T2
FZD2	GAIN.up	Inf	0.689655	0.025	0	1	0	1	0	496_T1
FZD4	GAIN.up	Inf	0.689655	0.025	0	1	0	1	0	307_T1
FZD5	GAIN.up	Inf	0.689655	0.025	0	1	0	1	0	385_T1
FZD7	GAIN.up	Inf	0.689655	0.025	0	1	0	1	0	385_T1
FZD8	GAIN.up	Inf	0.689655	0.025	0	1	0	1	0	299_T1
WNT1	GAIN.up	Inf	0.689655	0.025	0	1	0	1	0	397_T1
WNT10A	GAIN.up	Inf	0.689655	0.025	0	1	0	1	0	385_T1
WNT10B	GAIN.up	Inf	0.689655	0.025	0	1	0	1	0	397_T1
WNT5B	GAIN.up	Inf	0.689655	0.025	0	1	0	1	0	177_Prospective1
WNT6	GAIN.up	Inf	0.689655	0.025	0	1	0	1	0	385_T1
WNT8A	GAIN.up	Inf	0.689655	0.025	0	1	0	1	0	386_T1
AURKA	AMP.up	Inf	0.689655	0.025	0	1	0	1	0	303_T1
ERBB2	AMP.up	Inf	0.689655	0.025	0	1	0	1	0	391_T1
GATA3	AMP.up	Inf	0.689655	0.025	0	1	0	1	0	299_T1
IDH2	AMP.up	Inf	0.689655	0.025	0	1	0	1	0	338_T1
IL7R	AMP.up	Inf	0.689655	0.025	0	1	0	1	0	307_T1
MGAM	AMP.up	Inf	0.689655	0.025	0	1	0	1	0	290_T2
MITF	AMP.up	Inf	0.689655	0.025	0	2	0	1	0	408_T1B, 408_T1A
MLLT10	AMP.up	Inf	0.689655	0.025	0	1	0	1	0	299_T1
MSI1	AMP.up	Inf	0.689655	0.025	0	1	0	1	0	307_T1
NOTCH2	AMP.up	Inf	0.689655	0.025	0	1	0	1	0	350_T1
NRAS	AMP.up	Inf	0.689655	0.025	0	1	0	1	0	290_T2
NTRK3	AMP.up	Inf	0.689655	0.025	0	1	0	1	0	338_T1
PTPN1	AMP.up	Inf	0.689655	0.025	0	1	0	1	0	394_T2
RAB35	AMP.up	Inf	0.689655	0.025	0	1	0	1	0	307_T1
RAC2	AMP.up	Inf	0.689655	0.025	0	1	0	1	0	307_T1
RICTOR	AMP.up	Inf	0.689655	0.025	0	1	0	1	0	307_T1
RRAS	AMP.up	Inf	0.689655	0.025	0	1	0	1	0	177_Prospective1
VEGFA	AMP.up	Inf	0.689655	0.025	0	1	0	1	0	383_T1
BCL11B	AMP.up	Inf	0.689655	0.025	0	1	0	1	0	430_T1
BMPR1A	AMP.up	Inf	0.689655	0.025	0	1	0	1	0	398_T1
CCR4	AMP.up	Inf	0.689655	0.025	0	1	0	1	0	473_T1
CTNND2	AMP.up	Inf	0.689655	0.025	0	1	0	1	0	307_T1
HIST1H3B	AMP.up	Inf	0.689655	0.025	0	1	0	1	0	331_T1
HMGA2	AMP.up	Inf	0.689655	0.025	0	1	0	1	0	473_T1
MUC4	AMP.up	Inf	0.689655	0.025	0	1	0	1	0	290_T2
MYCL	AMP.up	Inf	0.689655	0.025	0	1	0	1	0	394_T2
NFATC2	AMP.up	Inf	0.689655	0.025	0	1	0	1	0	473_T1
SH3GL1	AMP.up	Inf	0.689655	0.025	0	1	0	1	0	568_T1
SUZ12	AMP.up	Inf	0.689655	0.025	0	1	0	1	0	346_T1
TET1	AMP.up	Inf	0.689655	0.025	0	1	0	1	0	307_T1
ZEB1	AMP.up	Inf	0.689655	0.025	0	1	0	1	0	299_T1
ZNF521	AMP.up	Inf	0.689655	0.025	0	1	0	1	0	307_T1
HIPK2	AMP.up	Inf	0.689655	0.025	0	1	0	1	0	385_T1
MLXIP	AMP.up	Inf	0.689655	0.025	0	1	0	1	0	307_T1
FZD10	AMP.up	Inf	0.689655	0.025	0	1	0	1	0	307_T1
FZD4	AMP.up	Inf	0.689655	0.025	0	1	0	1	0	307_T1
FZD8	AMP.up	Inf	0.689655	0.025	0	1	0	1	0	299_T1
WNT7A	AMP.up	Inf	0.689655	0.025	0	2	0	1	0	408_T1B, 408_T1A
PPP2R1A	AMP.up	Inf	0.689655	0.025	0	1	0	1	0	177_Prospective1
WT1	ACT	Inf	0.694915	0.025	0	1	0	1	0	408_T1B
DDB2	ACT	Inf	0.694915	0.025	0	1	0	1	0	408_T1B
LMO2	ACT	Inf	0.694915	0.025	0	1	0	1	0	408_T1B
DDB2	ACT.inc	Inf	0.694915	0.025	0	1	0	1	0	408_T1B
LMO2	ACT.inc	Inf	0.694915	0.025	0	1	0	1	0	408_T1B
WT1	AMP.up	Inf	0.694915	0.025	0	1	0	1	0	408_T1B
DDB2	AMP.up	Inf	0.694915	0.025	0	1	0	1	0	408_T1B
LMO2	AMP.up	Inf	0.694915	0.025	0	1	0	1	0	408_T1B
RPS6KB1	GAIN.up	0.868843	0.712366	0.25	0.277778	10	5	10	5	330_T1, 430_T1, 473_T1, 191_T1, 401_T1, 386_T1, 195_T1, 303_T1, 177_Prospective1, 496_T1	361_T1, 327_T1, 387_T1, 358_T1, 567_T1
CD79B	ACT.inc	0.884296	0.717663	0.15	0.166667	6	3	6	3	191_T1, 473_T1, 430_T1, 398_T1, 401_T1, 177_Prospective1	532_T1, 327_T1, 567_T1
EIF4EBP1	GAIN.up	0.884296	0.717663	0.15	0.166667	6	3	6	3	333_T1, 473_T1, 401_T1, 329_T1, 386_T1, 381_T1	434_T1, 376_T2, 327_T1
HLA-A	HOMDEL	0.890733	0.73292	0.1	0.111111	4	2	4	2	333_T1, 385_T1, 185_T1, 357_T1	358_T1, 516_T1
MAP2K4	HOMDEL	0.890733	0.73292	0.1	0.111111	4	2	4	2	333_T1, 357_T1, 195_T1, 177_Prospective1	314_T1, 614_T1
MDM4	ACT	0.890733	0.73292	0.1	0.111111	4	2	4	2	397_T1, 191_T1, 333_T1, 330_T1	452_T2, 376_T2
MDM4	ACT.inc	0.890733	0.73292	0.1	0.111111	4	2	4	2	397_T1, 191_T1, 333_T1, 330_T1	452_T2, 376_T2
LGR5	ACT.inc	0.890733	0.73292	0.1	0.111111	4	2	4	2	177_Prospective1, 430_T1, 329_T1, 303_T1	434_T1, 327_T1
SPOP	GAIN.up	0.890733	0.73292	0.1	0.111111	4	2	4	2	191_T1, 195_T1, 330_T1, 496_T1	358_T1, 387_T1
MDM4	AMP.up	0.890733	0.73292	0.1	0.111111	4	2	4	2	397_T1, 191_T1, 333_T1, 330_T1	452_T2, 376_T2
GTF2I	GAIN.up	0.867053	0.743048	0.1	0.111111	4	2	4	2	408_T1B, 366_T2, 290_T2, 357_T1	372_T1, 327_T1
ECT2L	HOMDEL	0.896492	0.775214	0.05	0.0555556	2	1	2	1	303_T1, 290_T2	260_T1
KMT2A	HOMDEL	0.896492	0.775214	0.05	0.0555556	2	1	2	1	292_T1, 366_T2	387_T1
FOXO3	HOMDEL	0.896492	0.775214	0.05	0.0555556	2	1	2	1	366_T2, 606_T1	532_T1
ABL2	ACT	0.896492	0.775214	0.05	0.0555556	2	1	2	1	397_T1, 386_T1	452_T2
DDR2	ACT	0.896492	0.775214	0.05	0.0555556	2	1	2	1	397_T1, 350_T1	452_T2
HOXB13	ACT	0.896492	0.775214	0.05	0.0555556	2	1	2	1	191_T1, 195_T1	358_T1
NCSTN	ACT	0.896492	0.775214	0.05	0.0555556	2	1	2	1	397_T1, 350_T1	452_T2
NTRK1	ACT	0.896492	0.775214	0.05	0.0555556	2	1	2	1	397_T1, 350_T1	452_T2
NUF2	ACT	0.896492	0.775214	0.05	0.0555556	2	1	2	1	397_T1, 350_T1	452_T2
RIT1	ACT	0.896492	0.775214	0.05	0.0555556	2	1	2	1	397_T1, 350_T1	452_T2
FCRL4	ACT	0.896492	0.775214	0.05	0.0555556	2	1	2	1	397_T1, 350_T1	452_T2
H3F3A	ACT	0.896492	0.775214	0.05	0.0555556	2	1	2	1	397_T1, 292_T1	452_T2
HIST1H3B	ACT	0.896492	0.775214	0.05	0.0555556	2	1	2	1	366_T2, 331_T1	260_T1
PBX1	ACT	0.896492	0.775214	0.05	0.0555556	2	1	2	1	397_T1, 350_T1	452_T2
PTK6	ACT	0.896492	0.775214	0.05	0.0555556	2	1	2	1	385_T1, 303_T1	372_T1
WNT3A	ACT	0.896492	0.775214	0.05	0.0555556	2	1	2	1	397_T1, 292_T1	452_T2
WNT9A	ACT	0.896492	0.775214	0.05	0.0555556	2	1	2	1	397_T1, 292_T1	452_T2
HOXB13	ACT.inc	0.896492	0.775214	0.05	0.0555556	2	1	2	1	191_T1, 195_T1	358_T1
MST1R	ACT.inc	0.896492	0.775214	0.05	0.0555556	2	1	2	1	338_T1, 366_T2	260_T1
NUF2	ACT.inc	0.896492	0.775214	0.05	0.0555556	2	1	2	1	397_T1, 350_T1	452_T2
PIK3CD	ACT.inc	0.896492	0.775214	0.05	0.0555556	2	1	2	1	366_T2, 383_T1	532_T1
PIK3CG	ACT.inc	0.896492	0.775214	0.05	0.0555556	2	1	2	1	307_T1, 331_T1	532_T1
SOX9	ACT.inc	0.896492	0.775214	0.05	0.0555556	2	1	2	1	366_T2, 177_Prospective1	567_T1
FCRL4	ACT.inc	0.896492	0.775214	0.05	0.0555556	2	1	2	1	397_T1, 350_T1	452_T2
H3F3A	ACT.inc	0.896492	0.775214	0.05	0.0555556	2	1	2	1	397_T1, 292_T1	452_T2
HIST1H3B	ACT.inc	0.896492	0.775214	0.05	0.0555556	2	1	2	1	366_T2, 331_T1	260_T1
KMT2A	ACT.inc	0.896492	0.775214	0.05	0.0555556	2	1	2	1	292_T1, 366_T2	260_T1
MAP2K4	ACT.inc	0.896492	0.775214	0.05	0.0555556	2	1	2	1	195_T1, 366_T2	614_T1
PBX1	ACT.inc	0.896492	0.775214	0.05	0.0555556	2	1	2	1	397_T1, 350_T1	452_T2
PTK6	ACT.inc	0.896492	0.775214	0.05	0.0555556	2	1	2	1	385_T1, 303_T1	372_T1
TRRAP	ACT.inc	0.896492	0.775214	0.05	0.0555556	2	1	2	1	307_T1, 366_T2	532_T1
ZEB1	ACT.inc	0.896492	0.775214	0.05	0.0555556	2	1	2	1	331_T1, 299_T1	260_T1
WNT3A	ACT.inc	0.896492	0.775214	0.05	0.0555556	2	1	2	1	397_T1, 292_T1	452_T2
WNT9A	ACT.inc	0.896492	0.775214	0.05	0.0555556	2	1	2	1	397_T1, 292_T1	452_T2
CDK12	GAIN.up	0.896492	0.775214	0.05	0.0555556	2	1	2	1	346_T1, 496_T1	387_T1
EGFR	GAIN.up	0.896492	0.775214	0.05	0.0555556	2	1	2	1	383_T1, 366_T2	452_T2
ETV1	GAIN.up	0.896492	0.775214	0.05	0.0555556	2	1	2	1	290_T2, 383_T1	452_T2
FGFR3	GAIN.up	0.896492	0.775214	0.05	0.0555556	2	1	2	1	331_T1, 195_T1	552_T1
FOXA1	GAIN.up	0.896492	0.775214	0.05	0.0555556	2	1	2	1	307_T1, 473_T1	567_T1
FOXL2	GAIN.up	0.896492	0.775214	0.05	0.0555556	2	1	2	1	346_T1, 331_T1	358_T1
IKZF3	GAIN.up	0.896492	0.775214	0.05	0.0555556	2	1	2	1	346_T1, 496_T1	387_T1
JAK3	GAIN.up	0.896492	0.775214	0.05	0.0555556	2	1	2	1	307_T1, 177_Prospective1	361_T1
MAP3K13	GAIN.up	0.896492	0.775214	0.05	0.0555556	2	1	2	1	346_T1, 331_T1	358_T1
MECOM	GAIN.up	0.896492	0.775214	0.05	0.0555556	2	1	2	1	346_T1, 331_T1	358_T1
PIK3CB	GAIN.up	0.896492	0.775214	0.05	0.0555556	2	1	2	1	346_T1, 331_T1	358_T1
PRKCI	GAIN.up	0.896492	0.775214	0.05	0.0555556	2	1	2	1	346_T1, 331_T1	358_T1
WHSC1	GAIN.up	0.896492	0.775214	0.05	0.0555556	2	1	2	1	331_T1, 195_T1	552_T1
CRTC1	GAIN.up	0.896492	0.775214	0.05	0.0555556	2	1	2	1	568_T1, 177_Prospective1	361_T1
TBL1XR1	GAIN.up	0.896492	0.775214	0.05	0.0555556	2	1	2	1	331_T1, 346_T1	358_T1
PIK3R2	GAIN.up	0.896492	0.775214	0.05	0.0555556	2	1	2	1	177_Prospective1, 568_T1	361_T1
DVL3	GAIN.up	0.896492	0.775214	0.05	0.0555556	2	1	2	1	346_T1, 331_T1	358_T1
ABL2	AMP.up	0.896492	0.775214	0.05	0.0555556	2	1	2	1	397_T1, 386_T1	452_T2
DDR2	AMP.up	0.896492	0.775214	0.05	0.0555556	2	1	2	1	397_T1, 350_T1	452_T2
HOXB13	AMP.up	0.896492	0.775214	0.05	0.0555556	2	1	2	1	191_T1, 195_T1	358_T1
NCSTN	AMP.up	0.896492	0.775214	0.05	0.0555556	2	1	2	1	397_T1, 350_T1	452_T2
NTRK1	AMP.up	0.896492	0.775214	0.05	0.0555556	2	1	2	1	397_T1, 350_T1	452_T2
NUF2	AMP.up	0.896492	0.775214	0.05	0.0555556	2	1	2	1	397_T1, 350_T1	452_T2
RIT1	AMP.up	0.896492	0.775214	0.05	0.0555556	2	1	2	1	397_T1, 350_T1	452_T2
FCRL4	AMP.up	0.896492	0.775214	0.05	0.0555556	2	1	2	1	397_T1, 350_T1	452_T2
H3F3A	AMP.up	0.896492	0.775214	0.05	0.0555556	2	1	2	1	397_T1, 292_T1	452_T2
PBX1	AMP.up	0.896492	0.775214	0.05	0.0555556	2	1	2	1	397_T1, 350_T1	452_T2
PTK6	AMP.up	0.896492	0.775214	0.05	0.0555556	2	1	2	1	385_T1, 303_T1	372_T1
WNT3A	AMP.up	0.896492	0.775214	0.05	0.0555556	2	1	2	1	397_T1, 292_T1	452_T2
WNT9A	AMP.up	0.896492	0.775214	0.05	0.0555556	2	1	2	1	397_T1, 292_T1	452_T2
MCL1	GAIN.up	0.762351	0.779137	0.275	0.333333	12	6	11	6	386_T1, 397_T1, 350_T1, 346_T1, 290_T2, 357_T1, 408_T1A, 408_T1B, 568_T1, 366_T2, 459_Archival1, 606_T1	452_T2, 434_T1, 515_T1, 552_T1, 516_T1, 509_T1
SETDB1	GAIN.up	0.762351	0.779137	0.275	0.333333	12	6	11	6	386_T1, 397_T1, 350_T1, 346_T1, 290_T2, 357_T1, 408_T1A, 408_T1B, 366_T2, 459_Archival1, 568_T1, 606_T1	452_T2, 434_T1, 552_T1, 509_T1, 515_T1, 516_T1
ARNT	GAIN.up	0.762351	0.779137	0.275	0.333333	12	6	11	6	386_T1, 397_T1, 350_T1, 346_T1, 290_T2, 357_T1, 408_T1A, 408_T1B, 459_Archival1, 606_T1, 568_T1, 366_T2	452_T2, 434_T1, 515_T1, 509_T1, 552_T1, 516_T1
PPM1D	GAIN.up	0.758641	0.780611	0.225	0.277778	9	5	9	5	330_T1, 191_T1, 473_T1, 430_T1, 401_T1, 398_T1, 195_T1, 496_T1, 177_Prospective1	361_T1, 387_T1, 327_T1, 358_T1, 567_T1
FCGR2B	GAIN.up	0.760347	0.781155	0.325	0.388889	14	7	13	7	290_T2, 397_T1, 394_T2, 350_T1, 357_T1, 408_T1B, 346_T1, 398_T1, 408_T1A, 381_T1, 366_T2, 535_T1, 606_T1, 459_Archival1	452_T2, 434_T1, 306_T1, 516_T1, 515_T1, 509_T1, 552_T1
RAC1	GAIN.up	0.873882	0.781937	0.05	0.0555556	2	1	2	1	383_T1, 408_T1B	452_T2
RIT1	GAIN.up	0.737274	0.795338	0.275	0.333333	11	6	11	6	397_T1, 350_T1, 290_T2, 357_T1, 191_T1, 346_T1, 408_T1B, 295_T1, 459_Archival1, 606_T1, 366_T2	452_T2, 434_T1, 509_T1, 552_T1, 516_T1, 515_T1
CDH1	HOMDEL	0.718613	0.801699	0.125	0.166667	6	3	5	3	535_T1, 391_T1, 408_T1A, 408_T1B, 397_T1, 366_T2	516_T1, 260_T1, 509_T1
CREBBP	GAIN.up	0.718613	0.801699	0.125	0.166667	5	3	5	3	195_T1, 350_T1, 346_T1, 381_T1, 366_T2	306_T1, 515_T1, 532_T1
H3F3B	GAIN.up	0.718613	0.801699	0.125	0.166667	5	3	5	3	338_T1, 307_T1, 195_T1, 177_Prospective1, 496_T1	361_T1, 327_T1, 567_T1
LGR5	ACT	0.653814	0.832512	0.075	0.111111	3	2	3	2	430_T1, 329_T1, 303_T1	434_T1, 327_T1
SPOP	ACT	0.653814	0.832512	0.075	0.111111	3	2	3	2	191_T1, 195_T1, 330_T1	358_T1, 387_T1
IKBKE	ACT.inc	0.653814	0.832512	0.075	0.111111	3	2	3	2	366_T2, 333_T1, 397_T1	452_T2, 376_T2
NTRK1	ACT.inc	0.653814	0.832512	0.075	0.111111	3	2	3	2	366_T2, 397_T1, 350_T1	376_T2, 452_T2
BCL9	ACT.inc	0.653814	0.832512	0.075	0.111111	3	2	3	2	295_T1, 350_T1, 397_T1	452_T2, 515_T1
SPOP	ACT.inc	0.653814	0.832512	0.075	0.111111	3	2	3	2	191_T1, 195_T1, 330_T1	358_T1, 387_T1
ETV5	GAIN.up	0.653814	0.832512	0.075	0.111111	3	2	3	2	346_T1, 331_T1, 295_T1	361_T1, 358_T1
KAT7	GAIN.up	0.653814	0.832512	0.075	0.111111	3	2	3	2	191_T1, 330_T1, 496_T1	361_T1, 387_T1
SRSF2	GAIN.up	0.653814	0.832512	0.075	0.111111	3	2	3	2	195_T1, 177_Prospective1, 496_T1	327_T1, 567_T1
SPOP	AMP.up	0.653814	0.832512	0.075	0.111111	3	2	3	2	191_T1, 195_T1, 330_T1	358_T1, 387_T1
BCL9	GAIN.up	0.678181	0.834092	0.3	0.388889	13	7	12	7	295_T1, 350_T1, 397_T1, 346_T1, 290_T2, 357_T1, 381_T1, 408_T1A, 408_T1B, 366_T2, 606_T1, 538_T1, 459_Archival1	452_T2, 434_T1, 361_T1, 552_T1, 516_T1, 515_T1, 509_T1
PPM1D	ACT	0.623099	0.852721	0.15	0.222222	6	4	6	4	330_T1, 191_T1, 473_T1, 430_T1, 401_T1, 177_Prospective1	361_T1, 387_T1, 327_T1, 567_T1
RPS6KB1	ACT	0.623099	0.852721	0.15	0.222222	6	4	6	4	330_T1, 430_T1, 473_T1, 191_T1, 401_T1, 177_Prospective1	361_T1, 327_T1, 387_T1, 567_T1
PPM1D	ACT.inc	0.623099	0.852721	0.15	0.222222	6	4	6	4	330_T1, 191_T1, 473_T1, 430_T1, 401_T1, 177_Prospective1	361_T1, 387_T1, 327_T1, 567_T1
RPS6KB1	ACT.inc	0.623099	0.852721	0.15	0.222222	6	4	6	4	330_T1, 430_T1, 473_T1, 191_T1, 401_T1, 177_Prospective1	361_T1, 327_T1, 387_T1, 567_T1
WHSC1L1	GAIN.up	0.623099	0.852721	0.15	0.222222	6	4	6	4	333_T1, 473_T1, 401_T1, 329_T1, 386_T1, 381_T1	434_T1, 376_T2, 327_T1, 567_T1
PPM1D	AMP.up	0.623099	0.852721	0.15	0.222222	6	4	6	4	330_T1, 191_T1, 473_T1, 430_T1, 401_T1, 177_Prospective1	361_T1, 387_T1, 327_T1, 567_T1
RPS6KB1	AMP.up	0.623099	0.852721	0.15	0.222222	6	4	6	4	330_T1, 430_T1, 473_T1, 191_T1, 401_T1, 177_Prospective1	361_T1, 327_T1, 387_T1, 567_T1
EIF4EBP1	ACT	0.561636	0.874648	0.1	0.166667	4	3	4	3	333_T1, 473_T1, 401_T1, 329_T1	434_T1, 376_T2, 327_T1
EIF4EBP1	ACT.inc	0.561636	0.874648	0.1	0.166667	4	3	4	3	333_T1, 473_T1, 401_T1, 329_T1	434_T1, 376_T2, 327_T1
EIF4EBP1	AMP.up	0.561636	0.874648	0.1	0.166667	4	3	4	3	333_T1, 473_T1, 401_T1, 329_T1	434_T1, 376_T2, 327_T1
NTRK1	GAIN.up	0.568322	0.892737	0.225	0.333333	9	6	9	6	366_T2, 397_T1, 350_T1, 290_T2, 357_T1, 346_T1, 408_T1B, 459_Archival1, 606_T1	452_T2, 434_T1, 552_T1, 516_T1, 509_T1, 515_T1
WHSC1L1	ACT.inc	0.506529	0.906745	0.125	0.222222	5	4	5	4	338_T1, 333_T1, 473_T1, 401_T1, 329_T1	434_T1, 376_T2, 327_T1, 567_T1
FGFR1	GAIN.up	0.506529	0.906745	0.125	0.222222	5	4	5	4	381_T1, 333_T1, 473_T1, 401_T1, 329_T1	376_T2, 434_T1, 327_T1, 567_T1
MLST8	GAIN.up	0.506529	0.906745	0.125	0.222222	5	4	5	4	195_T1, 350_T1, 346_T1, 381_T1, 366_T2	306_T1, 361_T1, 515_T1, 532_T1
ATR	HOMDEL	0.442887	0.907441	0.025	0.0555556	1	1	1	1	294_T2	509_T1
FOXP1	HOMDEL	0.442887	0.907441	0.025	0.0555556	1	1	1	1	398_T1	532_T1
MAP3K1	HOMDEL	0.442887	0.907441	0.025	0.0555556	1	1	1	1	350_T1	306_T1
NF1	HOMDEL	0.442887	0.907441	0.025	0.0555556	1	1	1	1	538_T1	614_T1
NOTCH2	HOMDEL	0.442887	0.907441	0.025	0.0555556	1	1	1	1	386_T1	532_T1
POLE	HOMDEL	0.442887	0.907441	0.025	0.0555556	1	1	1	1	366_T2	532_T1
PRF1	HOMDEL	0.442887	0.907441	0.025	0.0555556	1	1	1	1	349_T1	327_T1
PTPRK	HOMDEL	0.442887	0.907441	0.025	0.0555556	1	1	1	1	366_T2	260_T1
AKT3	ACT	0.442887	0.907441	0.025	0.0555556	1	1	1	1	397_T1	452_T2
ELF3	ACT	0.442887	0.907441	0.025	0.0555556	1	1	1	1	397_T1	452_T2
RFWD2	ACT	0.442887	0.907441	0.025	0.0555556	1	1	1	1	397_T1	452_T2
SMYD3	ACT	0.442887	0.907441	0.025	0.0555556	1	1	1	1	397_T1	452_T2
SOX9	ACT	0.442887	0.907441	0.025	0.0555556	1	1	1	1	177_Prospective1	567_T1
HNRNPA2B1	ACT	0.442887	0.907441	0.025	0.0555556	1	1	1	1	290_T2	452_T2
HOXA11	ACT	0.442887	0.907441	0.025	0.0555556	1	1	1	1	290_T2	452_T2
HOXA13	ACT	0.442887	0.907441	0.025	0.0555556	1	1	1	1	290_T2	452_T2
HOXA9	ACT	0.442887	0.907441	0.025	0.0555556	1	1	1	1	290_T2	452_T2
SRSF2	ACT	0.442887	0.907441	0.025	0.0555556	1	1	1	1	177_Prospective1	567_T1
AKT1S1	ACT	0.442887	0.907441	0.025	0.0555556	1	1	1	1	386_T1	376_T2
AKT3	ACT.inc	0.442887	0.907441	0.025	0.0555556	1	1	1	1	397_T1	452_T2
CDK12	ACT.inc	0.442887	0.907441	0.025	0.0555556	1	1	1	1	366_T2	387_T1
ELF3	ACT.inc	0.442887	0.907441	0.025	0.0555556	1	1	1	1	397_T1	452_T2
ERBB3	ACT.inc	0.442887	0.907441	0.025	0.0555556	1	1	1	1	366_T2	532_T1
FOXA1	ACT.inc	0.442887	0.907441	0.025	0.0555556	1	1	1	1	381_T1	614_T1
GNA12	ACT.inc	0.442887	0.907441	0.025	0.0555556	1	1	1	1	538_T1	452_T2
JAK3	ACT.inc	0.442887	0.907441	0.025	0.0555556	1	1	1	1	568_T1	361_T1
SMYD3	ACT.inc	0.442887	0.907441	0.025	0.0555556	1	1	1	1	397_T1	452_T2
WWTR1	ACT.inc	0.442887	0.907441	0.025	0.0555556	1	1	1	1	366_T2	361_T1
YAP1	ACT.inc	0.442887	0.907441	0.025	0.0555556	1	1	1	1	568_T1	260_T1
HOXA11	ACT.inc	0.442887	0.907441	0.025	0.0555556	1	1	1	1	290_T2	452_T2
HOXA13	ACT.inc	0.442887	0.907441	0.025	0.0555556	1	1	1	1	290_T2	452_T2
HOXA9	ACT.inc	0.442887	0.907441	0.025	0.0555556	1	1	1	1	290_T2	452_T2
NUP98	ACT.inc	0.442887	0.907441	0.025	0.0555556	1	1	1	1	366_T2	509_T1
USP6	ACT.inc	0.442887	0.907441	0.025	0.0555556	1	1	1	1	366_T2	509_T1
MLXIPL	ACT.inc	0.442887	0.907441	0.025	0.0555556	1	1	1	1	331_T1	532_T1
AKT1S1	ACT.inc	0.442887	0.907441	0.025	0.0555556	1	1	1	1	386_T1	376_T2
BRD4	GAIN.up	0.442887	0.907441	0.025	0.0555556	1	1	1	1	177_Prospective1	376_T2
MAP3K14	GAIN.up	0.442887	0.907441	0.025	0.0555556	1	1	1	1	496_T1	387_T1
NOTCH3	GAIN.up	0.442887	0.907441	0.025	0.0555556	1	1	1	1	177_Prospective1	376_T2
LYL1	GAIN.up	0.442887	0.907441	0.025	0.0555556	1	1	1	1	177_Prospective1	361_T1
SH3GL1	GAIN.up	0.442887	0.907441	0.025	0.0555556	1	1	1	1	568_T1	376_T2
AJUBA	GAIN.up	0.442887	0.907441	0.025	0.0555556	1	1	1	1	307_T1	358_T1
AKT1S1	GAIN.up	0.442887	0.907441	0.025	0.0555556	1	1	1	1	386_T1	376_T2
FZD3	GAIN.up	0.442887	0.907441	0.025	0.0555556	1	1	1	1	381_T1	387_T1
WNT9B	GAIN.up	0.442887	0.907441	0.025	0.0555556	1	1	1	1	496_T1	358_T1
AKT3	AMP.up	0.442887	0.907441	0.025	0.0555556	1	1	1	1	397_T1	452_T2
ELF3	AMP.up	0.442887	0.907441	0.025	0.0555556	1	1	1	1	397_T1	452_T2
RFWD2	AMP.up	0.442887	0.907441	0.025	0.0555556	1	1	1	1	397_T1	452_T2
SMYD3	AMP.up	0.442887	0.907441	0.025	0.0555556	1	1	1	1	397_T1	452_T2
SOX9	AMP.up	0.442887	0.907441	0.025	0.0555556	1	1	1	1	177_Prospective1	567_T1
HNRNPA2B1	AMP.up	0.442887	0.907441	0.025	0.0555556	1	1	1	1	290_T2	452_T2
HOXA11	AMP.up	0.442887	0.907441	0.025	0.0555556	1	1	1	1	290_T2	452_T2
HOXA13	AMP.up	0.442887	0.907441	0.025	0.0555556	1	1	1	1	290_T2	452_T2
HOXA9	AMP.up	0.442887	0.907441	0.025	0.0555556	1	1	1	1	290_T2	452_T2
SRSF2	AMP.up	0.442887	0.907441	0.025	0.0555556	1	1	1	1	177_Prospective1	567_T1
AKT1S1	AMP.up	0.442887	0.907441	0.025	0.0555556	1	1	1	1	386_T1	376_T2
AKT3	GAIN.up	0.541765	0.913497	0.3	0.444444	12	8	12	8	397_T1, 307_T1, 366_T2, 357_T1, 350_T1, 346_T1, 292_T1, 290_T2, 381_T1, 386_T1, 394_T2, 606_T1	452_T2, 387_T1, 306_T1, 434_T1, 515_T1, 552_T1, 516_T1, 509_T1
SMYD3	GAIN.up	0.541765	0.913497	0.3	0.444444	12	8	12	8	350_T1, 290_T2, 366_T2, 397_T1, 330_T1, 357_T1, 307_T1, 346_T1, 292_T1, 381_T1, 606_T1, 394_T2	452_T2, 361_T1, 515_T1, 552_T1, 516_T1, 387_T1, 306_T1, 434_T1
H3F3A	GAIN.up	0.541765	0.913497	0.3	0.444444	12	8	12	8	397_T1, 292_T1, 357_T1, 350_T1, 307_T1, 386_T1, 346_T1, 290_T2, 381_T1, 331_T1, 366_T2, 606_T1	452_T2, 306_T1, 434_T1, 387_T1, 509_T1, 515_T1, 552_T1, 516_T1
WNT3A	GAIN.up	0.541765	0.913497	0.3	0.444444	12	8	12	8	397_T1, 292_T1, 357_T1, 350_T1, 307_T1, 346_T1, 290_T2, 381_T1, 331_T1, 366_T2, 606_T1, 295_T1	434_T1, 452_T2, 387_T1, 306_T1, 552_T1, 509_T1, 515_T1, 516_T1
WNT9A	GAIN.up	0.541765	0.913497	0.3	0.444444	12	8	12	8	397_T1, 292_T1, 357_T1, 350_T1, 307_T1, 346_T1, 290_T2, 381_T1, 331_T1, 366_T2, 295_T1, 606_T1	387_T1, 452_T2, 434_T1, 306_T1, 509_T1, 515_T1, 552_T1, 516_T1
PTEN	HOMDEL	0.428106	0.915855	0.05	0.111111	2	2	2	2	303_T1, 299_T1	434_T1, 306_T1
IKBKE	ACT	0.428106	0.915855	0.05	0.111111	2	2	2	2	333_T1, 397_T1	452_T2, 376_T2
BCL9	ACT	0.428106	0.915855	0.05	0.111111	2	2	2	2	350_T1, 397_T1	452_T2, 515_T1
KAT7	ACT	0.428106	0.915855	0.05	0.111111	2	2	2	2	191_T1, 330_T1	361_T1, 387_T1
DDR2	ACT.inc	0.428106	0.915855	0.05	0.111111	2	2	2	2	397_T1, 350_T1	372_T1, 452_T2
RIT1	ACT.inc	0.428106	0.915855	0.05	0.111111	2	2	2	2	397_T1, 350_T1	532_T1, 452_T2
BIRC6	ACT.inc	0.428106	0.915855	0.05	0.111111	2	2	2	2	331_T1, 366_T2	306_T1, 509_T1
KAT7	ACT.inc	0.428106	0.915855	0.05	0.111111	2	2	2	2	191_T1, 330_T1	361_T1, 387_T1
PIK3CA	GAIN.up	0.428106	0.915855	0.05	0.111111	2	2	2	2	346_T1, 331_T1	361_T1, 358_T1
WWTR1	GAIN.up	0.428106	0.915855	0.05	0.111111	2	2	2	2	331_T1, 346_T1	361_T1, 358_T1
IKBKE	AMP.up	0.428106	0.915855	0.05	0.111111	2	2	2	2	333_T1, 397_T1	452_T2, 376_T2
BCL9	AMP.up	0.428106	0.915855	0.05	0.111111	2	2	2	2	350_T1, 397_T1	452_T2, 515_T1
KAT7	AMP.up	0.428106	0.915855	0.05	0.111111	2	2	2	2	191_T1, 330_T1	361_T1, 387_T1
ABL2	GAIN.up	0.480652	0.940878	0.275	0.444444	11	8	11	8	397_T1, 386_T1, 357_T1, 381_T1, 346_T1, 350_T1, 290_T2, 185_T1, 366_T2, 459_Archival1, 606_T1	452_T2, 434_T1, 306_T1, 361_T1, 515_T1, 552_T1, 516_T1, 509_T1
DDR2	GAIN.up	0.462917	0.944193	0.225	0.388889	9	7	9	7	397_T1, 350_T1, 366_T2, 357_T1, 346_T1, 290_T2, 381_T1, 606_T1, 459_Archival1	452_T2, 434_T1, 306_T1, 515_T1, 552_T1, 516_T1, 509_T1
NCSTN	GAIN.up	0.462917	0.944193	0.225	0.388889	10	7	9	7	366_T2, 397_T1, 350_T1, 290_T2, 357_T1, 408_T1B, 346_T1, 408_T1A, 381_T1, 606_T1	452_T2, 515_T1, 552_T1, 434_T1, 516_T1, 306_T1, 509_T1
NUF2	GAIN.up	0.462917	0.944193	0.225	0.388889	9	7	9	7	397_T1, 350_T1, 366_T2, 357_T1, 346_T1, 290_T2, 381_T1, 606_T1, 459_Archival1	452_T2, 515_T1, 552_T1, 434_T1, 516_T1, 306_T1, 509_T1
PBX1	GAIN.up	0.462917	0.944193	0.225	0.388889	9	7	9	7	397_T1, 350_T1, 357_T1, 346_T1, 290_T2, 381_T1, 366_T2, 606_T1, 459_Archival1	452_T2, 434_T1, 306_T1, 515_T1, 552_T1, 516_T1, 509_T1
FGFR1	ACT	0.396039	0.947596	0.1	0.222222	4	4	4	4	333_T1, 473_T1, 401_T1, 329_T1	376_T2, 434_T1, 327_T1, 567_T1
WHSC1L1	ACT	0.396039	0.947596	0.1	0.222222	4	4	4	4	333_T1, 473_T1, 401_T1, 329_T1	434_T1, 376_T2, 327_T1, 567_T1
FGFR1	ACT.inc	0.396039	0.947596	0.1	0.222222	4	4	4	4	333_T1, 473_T1, 401_T1, 329_T1	376_T2, 434_T1, 327_T1, 567_T1
FGFR1	AMP.up	0.396039	0.947596	0.1	0.222222	4	4	4	4	333_T1, 473_T1, 401_T1, 329_T1	376_T2, 434_T1, 327_T1, 567_T1
WHSC1L1	AMP.up	0.396039	0.947596	0.1	0.222222	4	4	4	4	333_T1, 473_T1, 401_T1, 329_T1	434_T1, 376_T2, 327_T1, 567_T1
ELK4	GAIN.up	0.430742	0.962391	0.4	0.611111	16	11	16	11	333_T1, 397_T1, 330_T1, 331_T1, 191_T1, 357_T1, 350_T1, 386_T1, 346_T1, 394_T2, 290_T2, 381_T1, 366_T2, 295_T1, 459_Archival1, 606_T1	452_T2, 376_T2, 434_T1, 387_T1, 306_T1, 361_T1, 567_T1, 515_T1, 509_T1, 552_T1, 516_T1
FCRL4	GAIN.up	0.387918	0.968954	0.2	0.388889	8	7	8	7	397_T1, 350_T1, 290_T2, 357_T1, 346_T1, 408_T1B, 366_T2, 606_T1	452_T2, 434_T1, 306_T1, 552_T1, 516_T1, 509_T1, 515_T1
NCOR1	HOMDEL	0.211617	0.973555	0.025	0.111111	1	2	1	2	366_T2	532_T1, 614_T1
SDHD	HOMDEL	0.211617	0.973555	0.025	0.111111	1	2	1	2	349_T1	376_T2, 509_T1
BCL11A	ACT.inc	0.211617	0.973555	0.025	0.111111	1	2	1	2	383_T1	260_T1, 306_T1
CACNA1D	ACT.inc	0.211617	0.973555	0.025	0.111111	1	2	1	2	366_T2	260_T1, 376_T2
CIC	ACT.inc	0.211617	0.973555	0.025	0.111111	1	2	1	2	366_T2	260_T1, 361_T1
SETBP1	ACT.inc	0.211617	0.973555	0.025	0.111111	1	2	1	2	459_Archival1	260_T1, 532_T1
SRSF2	ACT.inc	0.211617	0.973555	0.025	0.111111	1	2	1	2	177_Prospective1	260_T1, 567_T1
TBX3	ACT.inc	0.211617	0.973555	0.025	0.111111	1	2	1	2	292_T1	260_T1, 532_T1
MLXIP	ACT.inc	0.211617	0.973555	0.025	0.111111	1	2	1	2	307_T1	260_T1, 327_T1
ELF3	GAIN.up	0.391963	0.973989	0.325	0.555556	13	10	13	10	397_T1, 191_T1, 357_T1, 350_T1, 386_T1, 346_T1, 394_T2, 290_T2, 331_T1, 381_T1, 366_T2, 606_T1, 459_Archival1	452_T2, 434_T1, 376_T2, 387_T1, 306_T1, 361_T1, 552_T1, 509_T1, 515_T1, 516_T1
MDM4	GAIN.up	0.388477	0.975033	0.375	0.611111	15	11	15	11	397_T1, 191_T1, 366_T2, 333_T1, 330_T1, 357_T1, 350_T1, 386_T1, 346_T1, 394_T2, 290_T2, 381_T1, 331_T1, 459_Archival1, 606_T1	452_T2, 376_T2, 434_T1, 387_T1, 306_T1, 361_T1, 516_T1, 552_T1, 515_T1, 509_T1, 567_T1
RFWD2	GAIN.up	0.369949	0.976259	0.225	0.444444	9	8	9	8	397_T1, 366_T2, 606_T1, 386_T1, 357_T1, 346_T1, 350_T1, 290_T2, 459_Archival1	452_T2, 515_T1, 552_T1, 434_T1, 516_T1, 306_T1, 361_T1, 509_T1
IKBKE	GAIN.up	0.279511	0.994195	0.3	0.611111	12	11	12	11	366_T2, 333_T1, 397_T1, 357_T1, 350_T1, 386_T1, 346_T1, 394_T2, 290_T2, 381_T1, 459_Archival1, 606_T1	452_T2, 376_T2, 434_T1, 306_T1, 387_T1, 361_T1, 515_T1, 552_T1, 516_T1, 509_T1, 567_T1
CBL	HOMDEL	0	1	0	0.0555556	0	1	0	1		434_T1
CHEK2	HOMDEL	0	1	0	0.111111	0	2	0	2		372_T1, 358_T1
CTCF	HOMDEL	0	1	0	0.0555556	0	1	0	1		532_T1
FANCA	HOMDEL	0	1	0	0.0555556	0	1	0	1		516_T1
FLCN	HOMDEL	0	1	0	0.0555556	0	1	0	1		532_T1
RAD51C	HOMDEL	0	1	0	0.0555556	0	1	0	1		372_T1
RNF43	HOMDEL	0	1	0	0.0555556	0	1	0	1		532_T1
SPEN	HOMDEL	0	1	0	0.0555556	0	1	0	1		260_T1
CDH11	HOMDEL	0	1	0	0.0555556	0	1	0	1		260_T1
CDX2	HOMDEL	0	1	0	0.0555556	0	1	0	1		532_T1
EPAS1	HOMDEL	0	1	0	0.0555556	0	1	0	1		532_T1
LZTR1	HOMDEL	0	1	0	0.0555556	0	1	0	1		532_T1
NFE2L2	HOMDEL	0	1	0	0.0555556	0	1	0	1		532_T1
MOB1A	HOMDEL	0	1	0	0.0555556	0	1	0	1		532_T1
TAOK3	HOMDEL	0	1	0	0.0555556	0	1	0	1		260_T1
CRB1	HOMDEL	0	1	0	0.0555556	0	1	0	1		532_T1
LLGL2	HOMDEL	0	1	0	0.111111	0	2	0	2		327_T1, 372_T1
DCHS2	HOMDEL	0	1	0	0.0555556	0	1	0	1		532_T1
JAG2	HOMDEL	0	1	0	0.111111	0	2	0	2		327_T1, 532_T1
SOST	HOMDEL	0	1	0	0.0555556	0	1	0	1		358_T1
CALR	ACT	0	1	0	0.0555556	0	1	0	1		361_T1
CARD11	ACT	0	1	0	0.0555556	0	1	0	1		452_T2
ETV1	ACT	0	1	0	0.0555556	0	1	0	1		452_T2
GNA12	ACT	0	1	0	0.0555556	0	1	0	1		452_T2
JAK3	ACT	0	1	0	0.0555556	0	1	0	1		361_T1
MAP2K1	ACT	0	1	0	0.0555556	0	1	0	1		532_T1
MAP3K14	ACT	0	1	0	0.0555556	0	1	0	1		387_T1
RAC1	ACT	0	1	0	0.0555556	0	1	0	1		452_T2
WWTR1	ACT	0	1	0	0.0555556	0	1	0	1		361_T1
CRTC1	ACT	0	1	0	0.0555556	0	1	0	1		361_T1
LYL1	ACT	0	1	0	0.0555556	0	1	0	1		361_T1
USP6	ACT	0	1	0	0.0555556	0	1	0	1		509_T1
PIK3R2	ACT	0	1	0	0.0555556	0	1	0	1		361_T1
ALK	ACT.inc	0	1	0	0.0555556	0	1	0	1		532_T1
CALR	ACT.inc	0	1	0	0.0555556	0	1	0	1		361_T1
CARD11	ACT.inc	0	1	0	0.0555556	0	1	0	1		452_T2
ERG	ACT.inc	0	1	0	0.0555556	0	1	0	1		260_T1
ETV1	ACT.inc	0	1	0	0.0555556	0	1	0	1		452_T2
KDM5A	ACT.inc	0	1	0	0.0555556	0	1	0	1		532_T1
MAP2K1	ACT.inc	0	1	0	0.0555556	0	1	0	1		532_T1
MAP3K14	ACT.inc	0	1	0	0.0555556	0	1	0	1		387_T1
MECOM	ACT.inc	0	1	0	0.0555556	0	1	0	1		532_T1
NFE2L2	ACT.inc	0	1	0	0.111111	0	2	0	2		434_T1, 532_T1
NSD1	ACT.inc	0	1	0	0.0555556	0	1	0	1		260_T1
PGR	ACT.inc	0	1	0	0.0555556	0	1	0	1		260_T1
RAC1	ACT.inc	0	1	0	0.0555556	0	1	0	1		452_T2
STAT3	ACT.inc	0	1	0	0.0555556	0	1	0	1		532_T1
VAV1	ACT.inc	0	1	0	0.111111	0	2	0	2		314_T1, 532_T1
WHSC1	ACT.inc	0	1	0	0.0555556	0	1	0	1		260_T1
CRTC1	ACT.inc	0	1	0	0.0555556	0	1	0	1		361_T1
CTNNA2	ACT.inc	0	1	0	0.0555556	0	1	0	1		552_T1
LYL1	ACT.inc	0	1	0	0.0555556	0	1	0	1		361_T1
MN1	ACT.inc	0	1	0	0.0555556	0	1	0	1		376_T2
SKI	ACT.inc	0	1	0	0.0555556	0	1	0	1		532_T1
TAF15	ACT.inc	0	1	0	0.111111	0	2	0	2		260_T1, 532_T1
TNC	ACT.inc	0	1	0	0.0555556	0	1	0	1		260_T1
TRIM27	ACT.inc	0	1	0	0.0555556	0	1	0	1		260_T1
WTIP	ACT.inc	0	1	0	0.0555556	0	1	0	1		260_T1
PIK3R2	ACT.inc	0	1	0	0.0555556	0	1	0	1		361_T1
LRP6	ACT.inc	0	1	0	0.0555556	0	1	0	1		532_T1
DVL1	ACT.inc	0	1	0	0.111111	0	2	0	2		260_T1, 387_T1
DVL3	ACT.inc	0	1	0	0.0555556	0	1	0	1		532_T1
FZD1	ACT.inc	0	1	0	0.0555556	0	1	0	1		434_T1
CALR	GAIN.up	0	1	0	0.0555556	0	1	0	1		361_T1
CCNE1	GAIN.up	0	1	0	0.0555556	0	1	0	1		372_T1
KMT2B	GAIN.up	0	1	0	0.111111	0	2	0	2		376_T2, 372_T1
MAP2K2	GAIN.up	0	1	0	0.0555556	0	1	0	1		376_T2
PRKACA	GAIN.up	0	1	0	0.0555556	0	1	0	1		376_T2
USP6	GAIN.up	0	1	0	0.111111	0	2	0	2		372_T1, 509_T1
WTIP	GAIN.up	0	1	0	0.111111	0	2	0	2		372_T1, 376_T2
CALR	AMP.up	0	1	0	0.0555556	0	1	0	1		361_T1
CARD11	AMP.up	0	1	0	0.0555556	0	1	0	1		452_T2
ETV1	AMP.up	0	1	0	0.0555556	0	1	0	1		452_T2
GNA12	AMP.up	0	1	0	0.0555556	0	1	0	1		452_T2
JAK3	AMP.up	0	1	0	0.0555556	0	1	0	1		361_T1
MAP3K14	AMP.up	0	1	0	0.0555556	0	1	0	1		387_T1
PIK3CA	AMP.up	0	1	0	0.0555556	0	1	0	1		361_T1
RAC1	AMP.up	0	1	0	0.0555556	0	1	0	1		452_T2
WWTR1	AMP.up	0	1	0	0.0555556	0	1	0	1		361_T1
CRTC1	AMP.up	0	1	0	0.0555556	0	1	0	1		361_T1
LYL1	AMP.up	0	1	0	0.0555556	0	1	0	1		361_T1
USP6	AMP.up	0	1	0	0.0555556	0	1	0	1		509_T1
PIK3R2	AMP.up	0	1	0	0.0555556	0	1	0	1		361_T1
